# Supplementary material
Source: PubMed Central journal article supplement (PMC5767880)
Supplement: jm7b01427_si_001.pdf [file jm7b01427_si_001.pdf]

## Supporting Information

### **A Stable Heroin Analog That Can Serve as a Vaccine Hapten to Induce Antibodies that Block the Effects of Heroin and its Metabolites in Rodents and that Cross-React Immunologically with Related Drugs of Abuse**

Agnieszka Sulima,<sup>†</sup> Rashmi Jalah,<sup>§,#</sup> Joshua F. G. Antoline,<sup>†</sup> Oscar B. Torres,<sup>§,#</sup> Gregory H. Imler,<sup>‡</sup> Jeffrey R. Deschamps,<sup>‡</sup> Zoltan Beck,<sup>§,#</sup> Carl R. Alving,<sup>§</sup> Arthur E. Jacobson,<sup>†</sup> Kenner C. Rice<sup>†,\*</sup>, Gary R. Matyas,<sup>#,\*</sup>

<sup>†</sup>Drug Design and Synthesis Section, Molecular Targets and Medications Discovery Branch, Intramural Research Program, National Institute on Drug Abuse and the National Institute on Alcohol Abuse and Alcoholism, National Institutes of Health, Department of Health and Human Services, 9800 Medical Center Drive, Bethesda, MD 20892-3373, United States

<sup>‡</sup>Center for Biomolecular Science and Engineering, Naval Research Laboratory, Washington DC 20375, United States

<sup>§</sup>U.S. Military HIV Research Program, <sup>#</sup> Henry M. Jackson Foundation for the Advancement of Military Medicine, Walter Reed Army Institute of Research, 6720A Rockledge Drive, Bethesda, MD 20817, United States

<sup>#</sup>U.S. Military HIV Research Program, Walter Reed Army Institute of Research, 503 Robert Grant Avenue, Silver Spring, MD 20910, United States

\*Corresponding authors

| <b>Contents</b>                                                                                                         | <b>Page</b> |
|-------------------------------------------------------------------------------------------------------------------------|-------------|
| Fig. S1. MALDI-TOF MS of TT-1 and TT-3                                                                                  | S4          |
| Fig. S2. SDS and Native PAGE of TT-1 and TT-3                                                                           | S5          |
| Fig. S3. Study design for testing of TT-1 and TT-3 vaccines in mice                                                     | S6          |
| Fig. S4. Anti-TT IgG in week 8 mice and rat sera                                                                        | S7          |
| Fig. S5. Study design for testing of TT-1 vaccines in rats                                                              | S8          |
| Fig. S6. Structures of the drugs, which were used in the competition ELISA                                              | S9          |
| Fig. S7. Competition ELISA of mouse <b>1</b> and <b>3</b> induced antibodies against heroin and metabolites             | S10         |
| Fig. S8. Competition ELISA of mouse <b>1</b> and <b>3</b> induced antibodies against drugs used in opioid abuse therapy | S11         |
| Fig. S9. Competition ELISA of mouse <b>1</b> and <b>3</b> induced antibodies against other abused opioids               | S12         |
| Fig. S10. Competition ELISA of mouse <b>1</b> and <b>3</b> induced antibodies against non-narcotic analgesics           | S13         |
| Fig. S11. Competition ELISA of mouse <b>1</b> and <b>3</b> induced antibodies against endogenous opioid peptides        | S14         |
| Fig. S12. Competition ELISA of rat <b>1</b> induced antibodies against heroin and metabolites                           | S15         |
| Fig. S13. Competition ELISA of rat <b>1</b> induced antibodies against other abused opioids                             | S16         |
| Fig. S14. Competition ELISA of rat <b>1</b> induced antibodies against drugs used in opioid abuse therapy               | S17         |
| Fig. S15. Competition ELISA of rat <b>1</b> induced antibodies against non-narcotic analgesics                          | S18         |
| Fig. S16. Competition ELISA of rat <b>1</b> induced antibodies against endogenous opioid peptides                       | S19         |
| Fig. S17. Three-dimensional model of <b>1</b> and <b>3</b>                                                              | S20         |
| Fig. S18. Anti-morphine ELISA standard curves                                                                           | S21         |
| Fig. S19. <sup>1</sup> H NMR of <b>1</b>                                                                                | S22         |
| Fig. S20. <sup>13</sup> C NMR of <b>1</b>                                                                               | S23         |
| Fig. S21. <sup>1</sup> H NMR of <b>12</b>                                                                               | S24         |
| Fig. S22. <sup>13</sup> C NMR of <b>12</b>                                                                              | S25         |
| Fig. S23. <sup>1</sup> H NMR of <b>13</b>                                                                               | S26         |
| Fig. S24. <sup>13</sup> C NMR of <b>13</b>                                                                              | S27         |
| Fig. S25. <sup>1</sup> H NMR of <b>15</b>                                                                               | S28         |
| Fig. S26. <sup>13</sup> C NMR of <b>15</b>                                                                              | S29         |
| Fig. S27. <sup>1</sup> H NMR of <b>16</b>                                                                               | S30         |
| Fig. S28. <sup>13</sup> C NMR of <b>16</b>                                                                              | S31         |
| Table S1. Individual mouse <b>1</b> and <b>3</b> induced antibody affinities                                            | S32         |
| Table S2. Individual rat <b>1</b> induced antibody affinities                                                           | S33         |
| Table S3. Microanalysis (CHN)                                                                                           | S34         |
| Table S4. Crystallographic data for <b>19</b>                                                                           | S35         |
| Table S5. Atomic coordinates and isotropic displacement parameters for <b>19</b>                                        | S36         |

|                                                                                     |         |
|-------------------------------------------------------------------------------------|---------|
| Table S6. Bond lengths and angles for <b>19</b>                                     | S37-S39 |
| Table S7. Anisotropic displacement parameters for <b>19</b>                         | S40     |
| Table S8. Hydrogen coordinates and isotropic displacement parameters for <b>19</b>  | S41     |
| Table S9. Torsion angles for <b>19</b>                                              | S42     |
| Table S10. Hydrogen bonds for <b>19</b>                                             | S43     |
| Table S11. Crystallographic data for <b>20</b>                                      | S44     |
| Table S12. Atomic coordinates and isotropic displacement parameters for <b>20</b>   | S45     |
| Table S13. Bond lengths and angles for <b>20</b>                                    | S46-S48 |
| Table S14. Anisotropic displacement parameters for <b>20</b>                        | S49     |
| Table S15. Hydrogen coordinates and isotropic displacement parameters for <b>20</b> | S50     |
| Table S16. Torsion angles for <b>20</b>                                             | S51     |
| Table S17. Hydrogen bonds for <b>20</b>                                             | S52     |
| References for Supporting Information                                               | S53     |

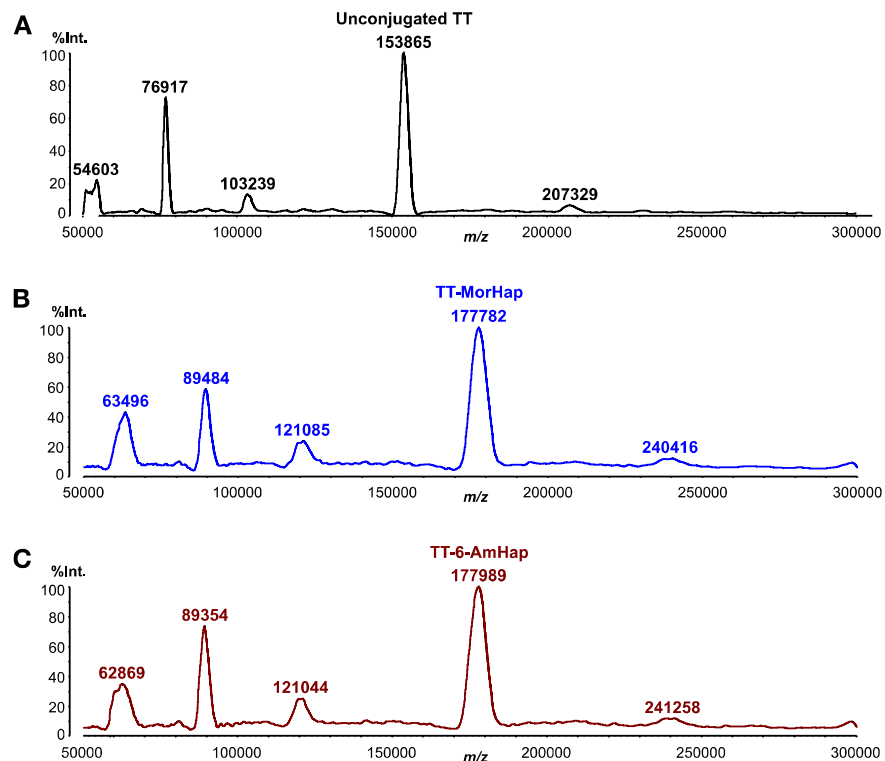

**Figure S1. MALDI-TOF MS spectra of heroin vaccine bioconjugates.** The Matrix-Assisted Laser Desorption Ionization Time-of-Flight Mass Spectroscopy (MALDI-TOF MS) spectra of unconjugated tetanus toxoid carrier protein (A; TT; top black panel), TT-3 (MorHap) (B; middle blue panel) and TT-1 (6-AmHap) (C; bottom maroon panel) conjugates are shown. MALDI-TOF MS was performed using the Axima MegaTOF™ instrument (Shimadzu Scientific Instruments, Columbia, MD), as described before.<sup>1-3</sup> Briefly, TT and the TT-hapten conjugates generated using 1:1600 ratio of TT to (SM-(PEG)<sub>2</sub> linker were desalted using C<sub>4</sub> ZipTip (Millipore), mixed and spotted with sinapinic acid matrix (Sigma) and the mass spectra were acquired. The instrument was calibrated using IgG (Sigma) as standard. The average of 500 mass profiles in the linear mode were taken, smoothed using Gaussian method and mass assignments were done using threshold apex peak detection.

For the unconjugated TT (A), various peaks corresponding to the TT light chain (55 kDa, m/z), the doubly charged ion (77 kDa), the TT heavy chain (103 kDa), the TT monomer (major peak; 154 kDa), TT heavy chain dimer (207 kDa) and the TT dimer (307 kDa, not shown) were observed. Subsequent increases in mol. wt. were observed for all the TT forms in the TT-hapten conjugates. The differences in mol. wt. of the major peak (~154 kDa) were used to calculate the number of haptens attached to TT using the expression:

$$\text{Number of haptens} = \frac{Mass_{TT-hapten\ conjugate} - Mass_{TT\ carrier\ protein}}{Mass_{hapten-linker}}$$

$Mass_{MorHap-linker}$  and  $Mass_{6-AmHap-linker}$  were 682.27 and 725.31 g/mol respectively. Both conjugates had similar high number of ~32-36 haptens attached per TT molecule in several synthesis.

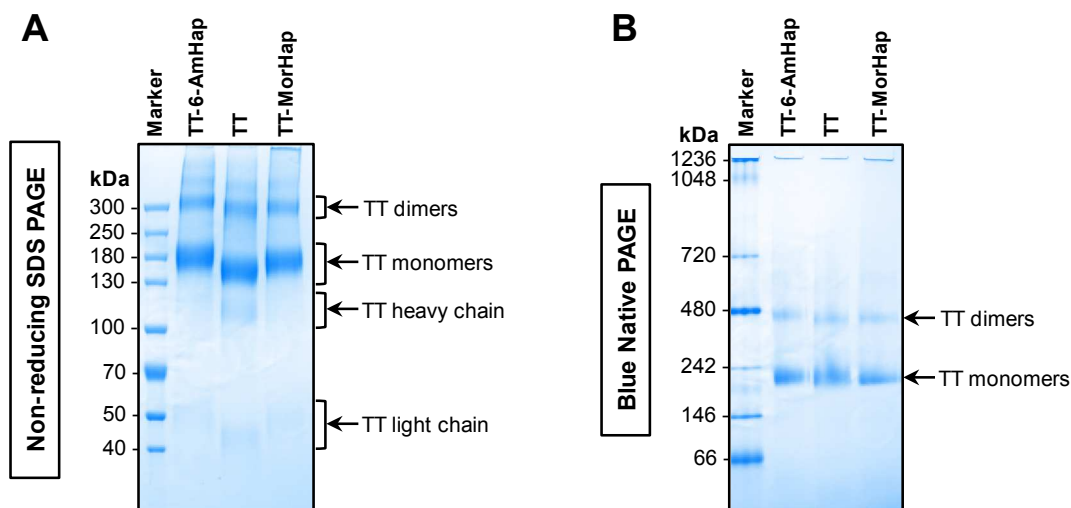

**Figure S2. Analysis of heroin vaccine bioconjugates by protein gel electrophoresis.** Non-reducing SDS PAGE (panel A) and Blue Native PAGE (panel B) gel analysis of unconjugated TT, TT-1 (6-AmHap), and TT-3 (MorHap) conjugates is shown. The molecular weight marker sizes (kDa) are indicated on the left, the various protein forms are indicated on the right and the samples loaded in each lane are indicated on top of the gels. All reagents were purchased from *Life Technologies Corp.*, CA, USA and used as per the manufacturer's instructions.

For SDS PAGE, 5  $\mu$ g of proteins were run under non-reducing conditions on NuPAGE Novex 4-12% Bis-Tris gels in MOPS running buffer (A). The reducing agent was omitted to avoid the thiol exchange of the thioether bond between the haptens and the maleimide end of the SM-(PEG)<sub>2</sub> linker. The gels were stained with the Imperial™ coomassie dye R-250 based protein stain (Cat # 24615). The Spectra™ multicolor high range protein ladder (Cat # 26625) was used as the marker. For unconjugated TT, the major band for the TT monomer (~150 kDa), the TT dimer (~300 kDa) and faint amounts of the TT heavy (~100 kDa) and light (~50 kDa) chains were observed. All these forms showed slight increase in sizes in the TT conjugates. Both TT-1 and TT-3 conjugates had similar sizes indicating similar hapten loading and none of them had high molecular weight protein aggregates.

For native PAGE, 5  $\mu$ g of the same samples were mixed with the NativePAGE™ sample buffer and run on NativePAGE 4-16% Bis-Tris gels in NativePAGE running buffer that contains Coomassie G-250 as a charge-shift molecule in the cathode buffer instead of SDS (B). The NativeMark™ unstained protein standard (Cat # LC0725) was used as the marker. The dimeric and monomeric forms were observed for TT and the TT conjugates. Blue Native PAGE analysis confirmed the absence of protein aggregates in any sample, which is required for an ideal vaccine candidate.

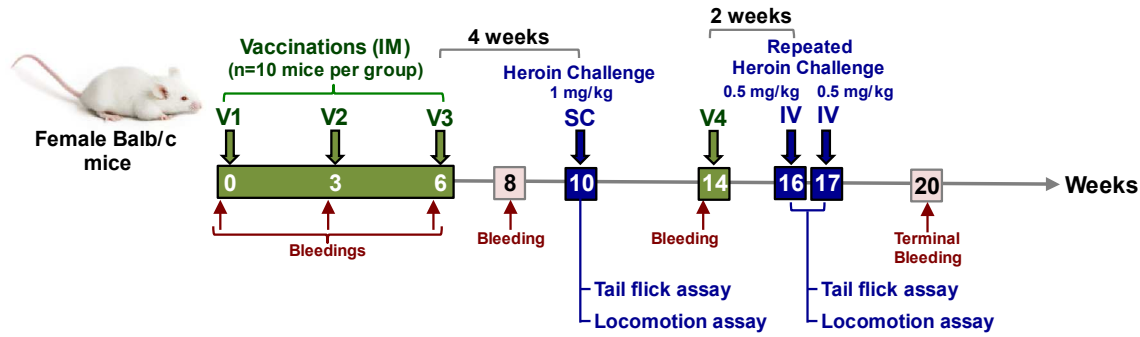

**Fig S3. Study design for testing of TT-1 and TT-3 heroin vaccines in mice.** Vaccine administration (V1-V3), bleeding, subcutaneous (SC) and intravenous (IV) heroin challenges are indicated by arrows. Groups of 10 mice each were intramuscularly (IM) immunized at weeks 0, 3, and 6 with either TT-1 + ALF or TT-3 + ALF. All mice were bled prior to each vaccination and 2 weeks (week 8) before heroin challenge. At week 10, mice were challenged with SC heroin (1 mg/kg). The mice were immunized at week 14 and then re-challenged with IV heroin at weeks 16 and 17. The vaccine efficacy upon heroin challenge was monitored by the tail flick and locomotion assays. At week 20, the mice were euthanized and the blood was collected by cardiac puncture.

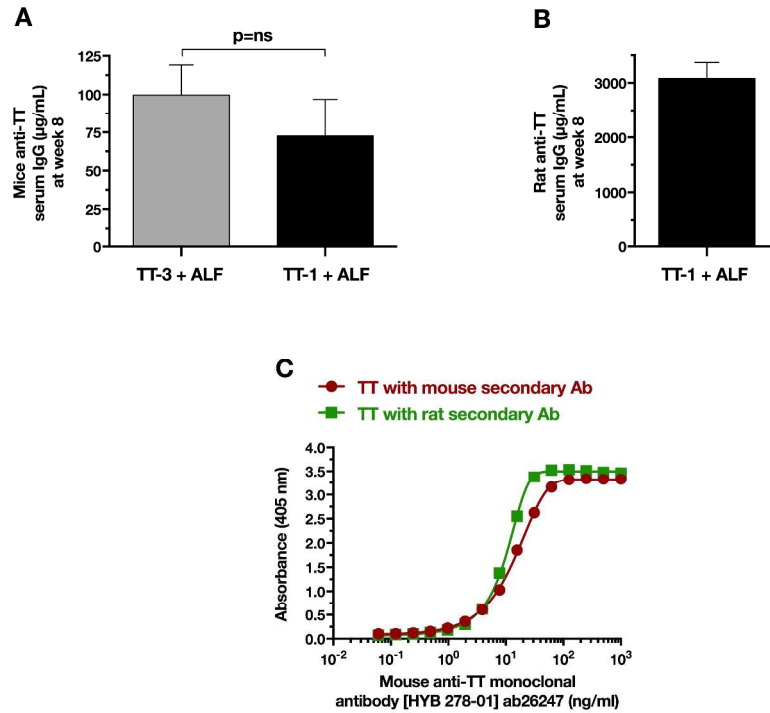

**Figure S4. Anti-TT serum IgG levels at week 8 in mice and rats.** Both TT-1 and TT-3 generated similar anti-TT levels in mice (A,  $p=ns$ ). The anti-TT levels in TT-1 vaccinated rats (B) were ~40-fold higher than in mice probably due to 10-fold higher doses of antigen and MPLA used and were maintained at similar levels at week 14 (data not shown). Both mouse and rat secondary antibodies bound well to the mouse anti-tetanus toxoid (TT) monoclonal antibody [HYB-278-01] (AbCam, Cat. No. ab26247) (C) that was used as standard curve for quantification of serum TT carrier protein specific IgG levels in mice (A) and rats (B) as described previously.<sup>2</sup>

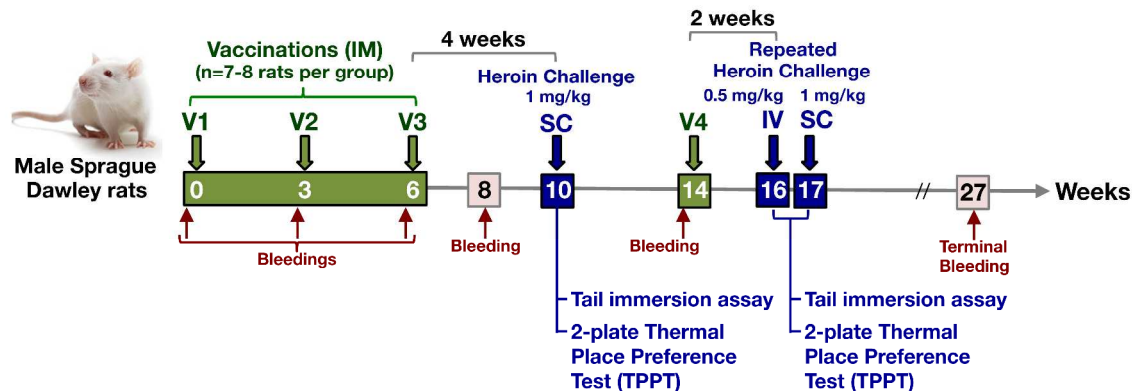

**Figure S5. Study design for testing of TT-1 heroin vaccines in rats.** Vaccine administration (V1-V3), bleeding, subcutaneous (SC) and intravenous (IV) heroin challenges are indicated by arrows. Eight rats were intramuscularly (IM) immunized at weeks 0, 3, and 6 with TT-1 + ALF. All rats were bled prior to each vaccination and 2 weeks (week 8) before heroin challenge. At week 10, rats were challenged with SC heroin (1 mg/kg). The rats were immunized at week 14 and then re-challenged with IV and SC heroin at weeks 16 and 17, respectively. The vaccine efficacy upon heroin challenge was monitored by the tail immersion assay and thermal place preference test (TPPT). At week 27, the rats were euthanized and the blood was collected by cardiac puncture.



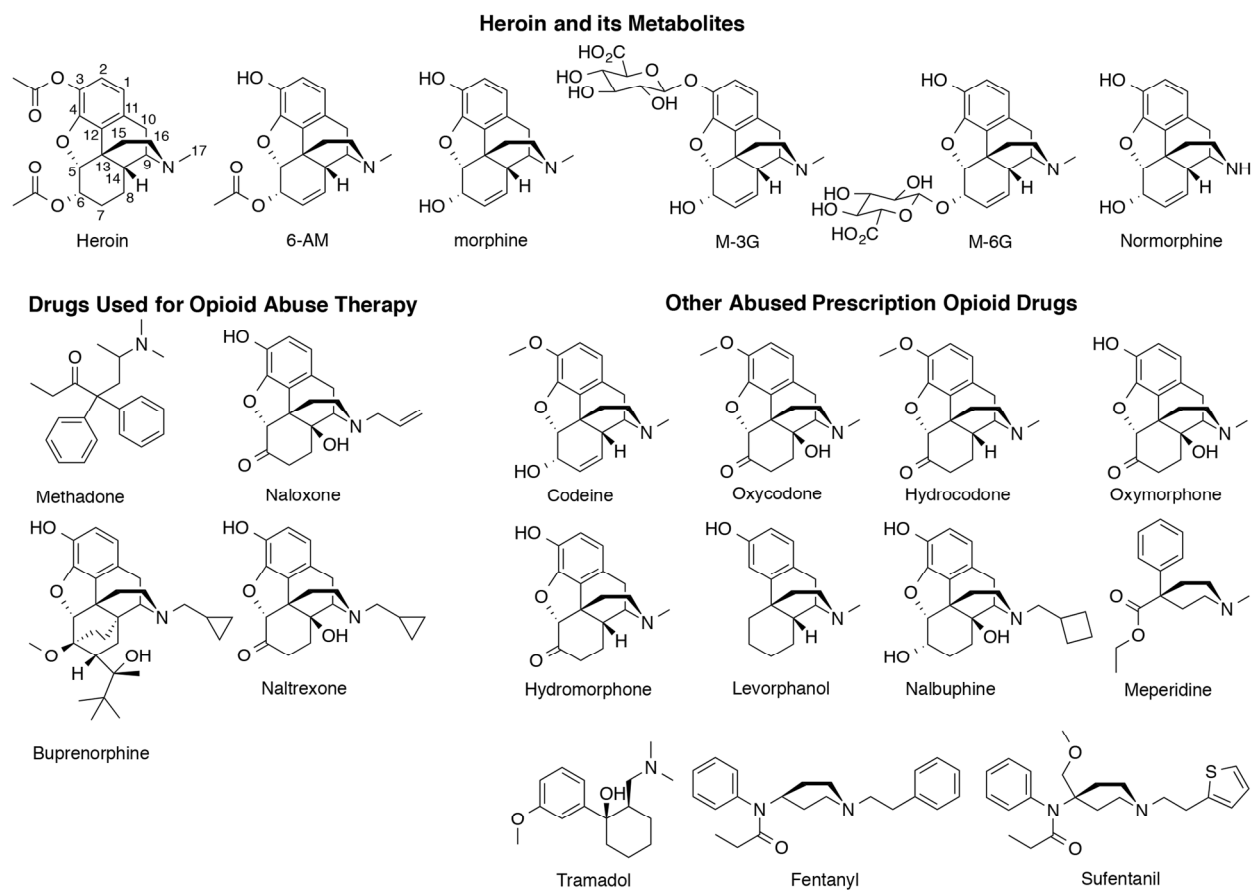

**Figure S6. Structures of the drugs, which were used in the competition ELISA.**

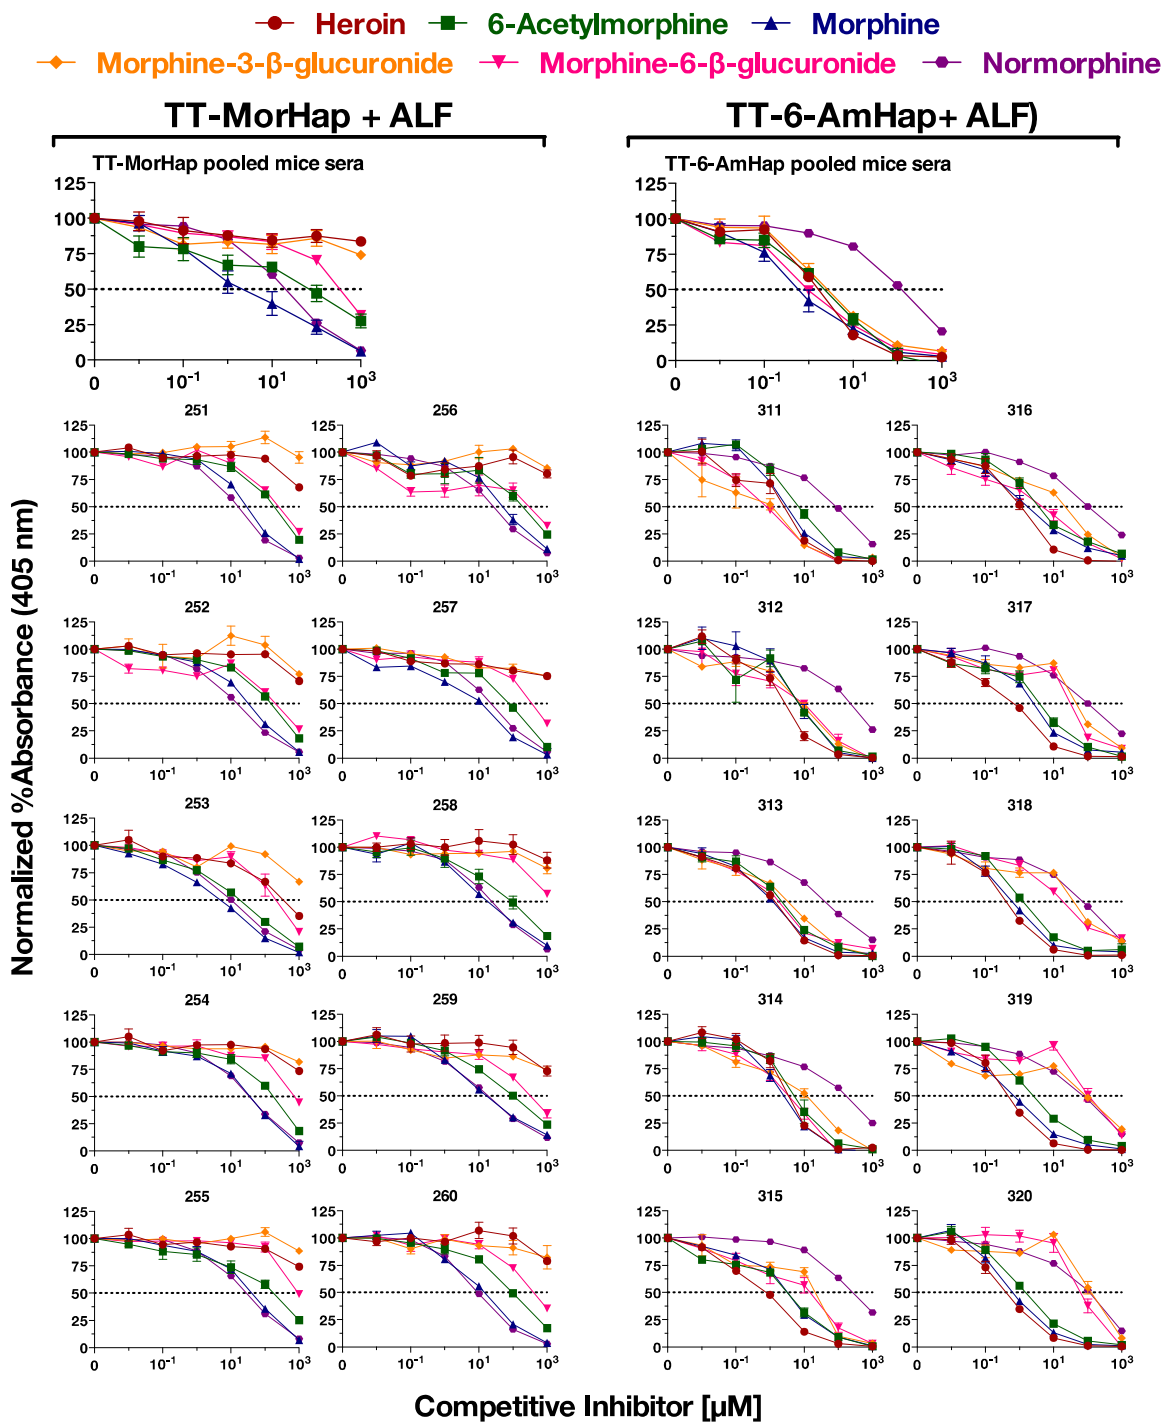

**Figure S7. Competitive inhibition in ELISA for the binding of mouse 1 and 3 induced antibodies by heroin and its metabolites.** Normalized competition ELISA curves showing Mean  $\pm$  SEM of triplicate determinations from pooled and individual mice sera from week 8 are shown. IC<sub>50</sub> values were calculated and are shown in supplemental Table S1 on page S32. TT-1 generated antibodies with significantly higher affinities for heroin and its active metabolites than TT-3.

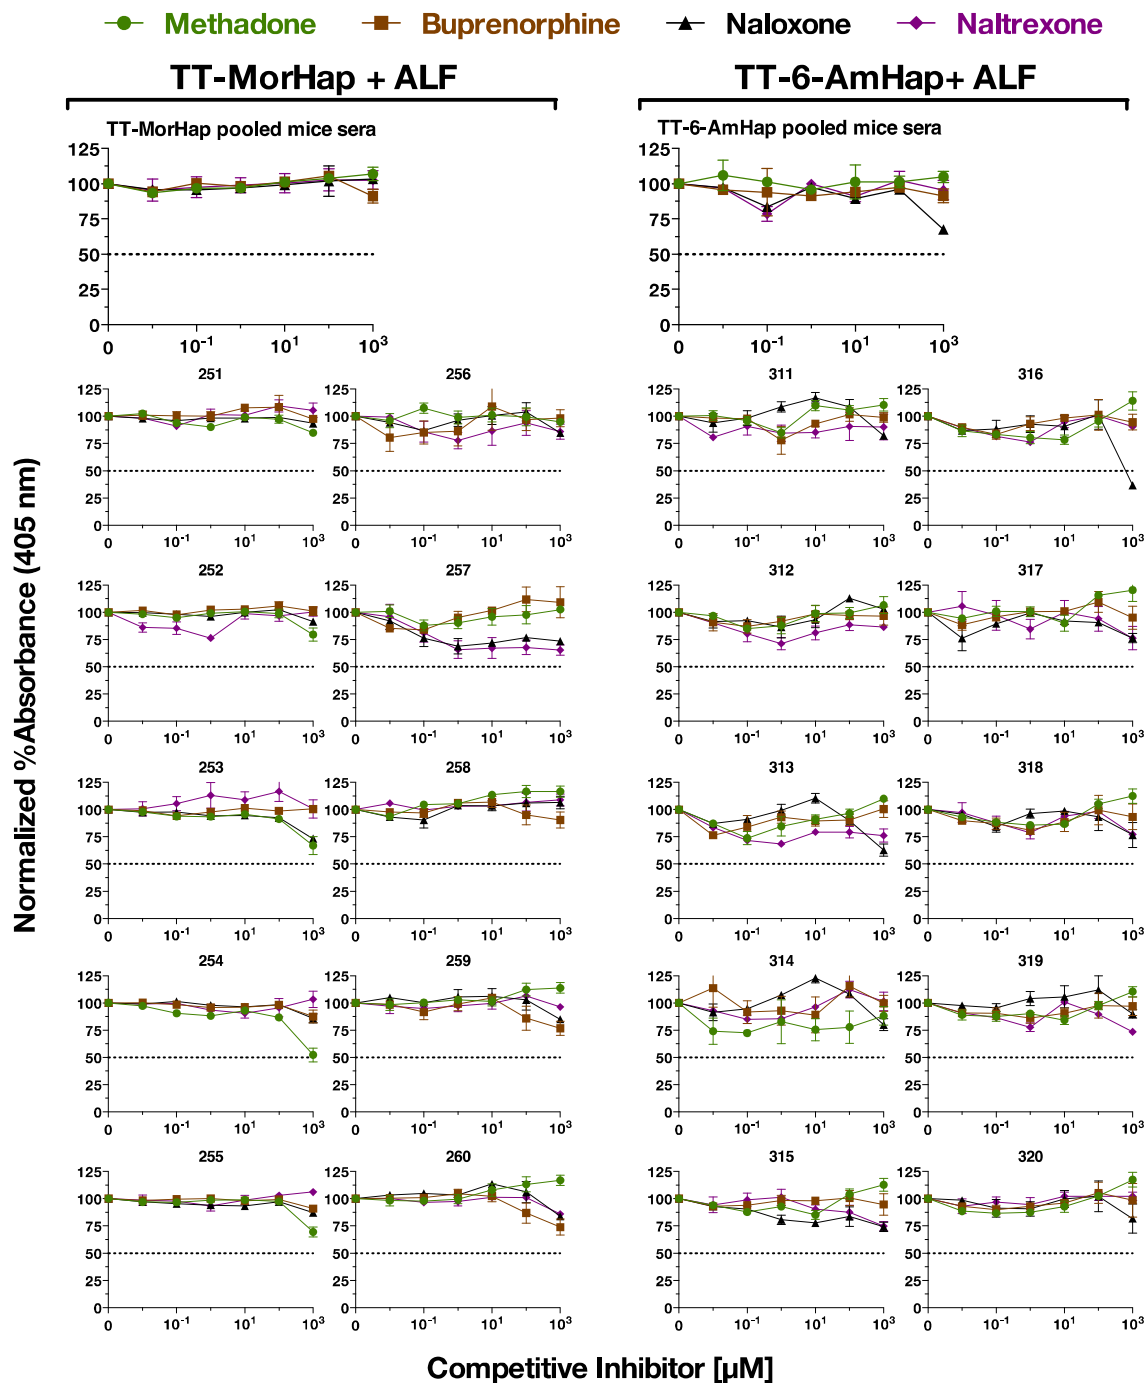

**Figure S8. Competitive inhibition in ELISA for the binding of mouse 1 and 3 induced antibodies by drugs used for opioid abuse therapy.** Normalized competition ELISA curves showing Mean  $\pm$  SEM of triplicate determinations from pooled and individual mice sera from week 8 are shown.  $IC_{50}$  for all drugs was  $>1000$  for all samples indicating no binding of the hapten antibodies to these drugs. Hence, immunization with these heroin vaccines would not interfere with the pharmacotherapy of patients undergoing treatment for heroin addiction. This is an essential requirement for any potential heroin vaccine.

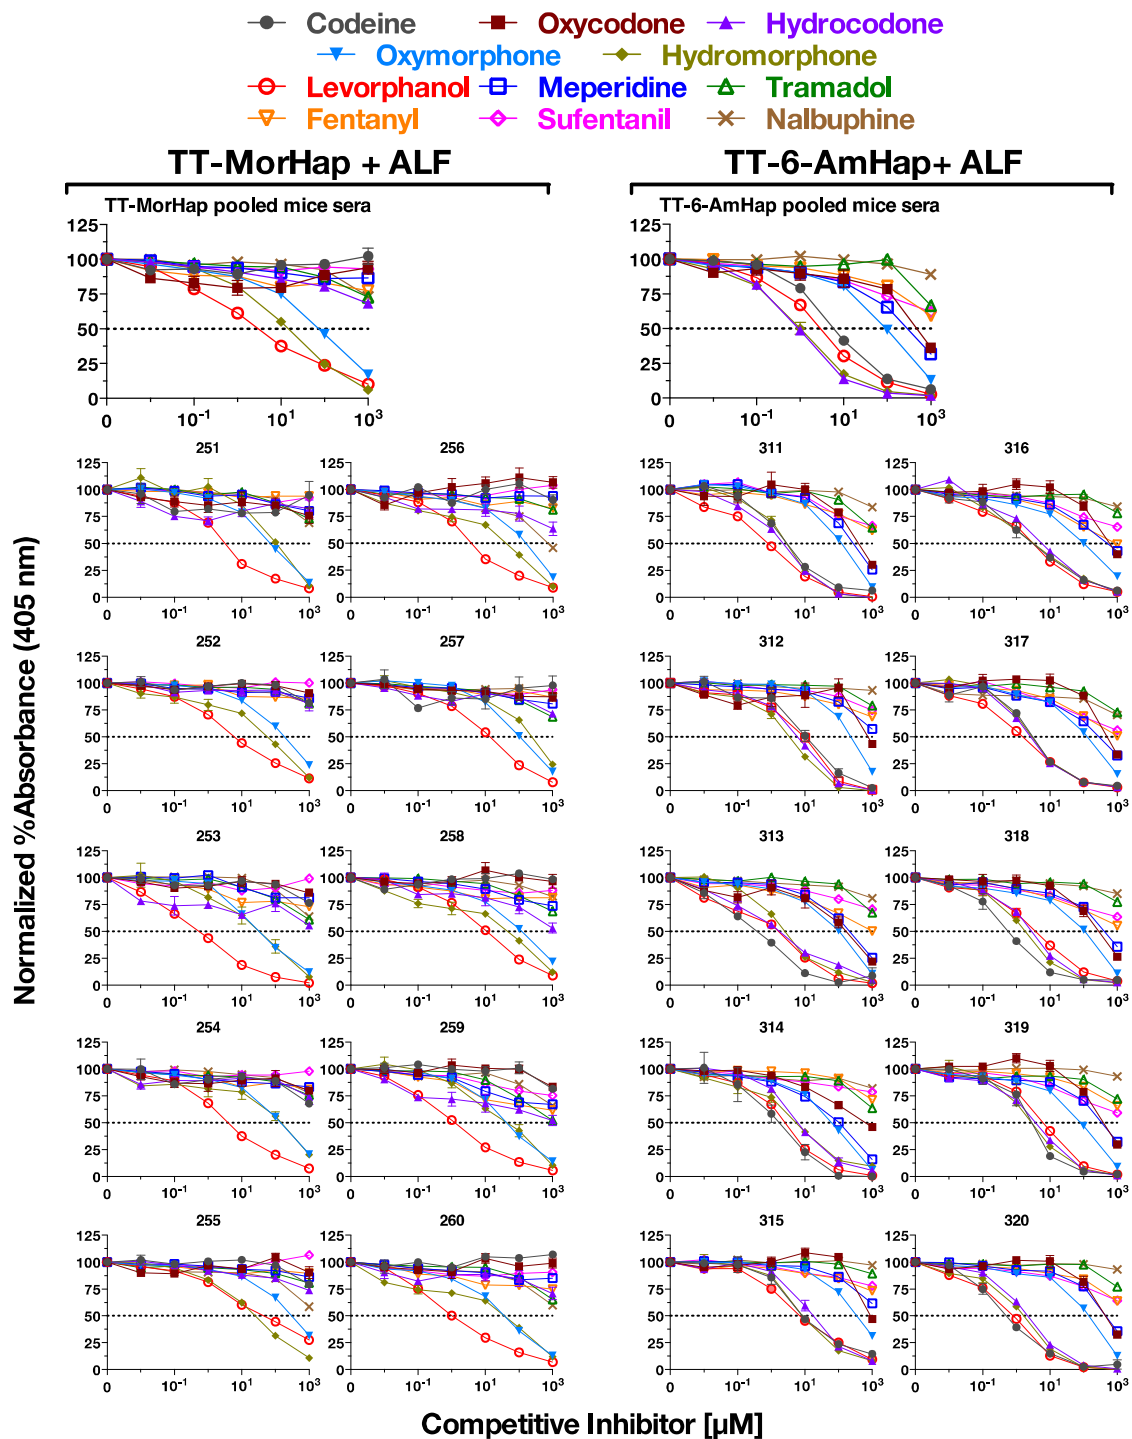

**Figure S9. Competitive inhibition in ELISA for the binding of mouse 1 and 3 induced antibodies by other abused prescription opioid drugs.** Normalized competition ELISA curves showing Mean  $\pm$  SEM of triplicate determinations from pooled and individual mice sera from week 8 are shown. IC<sub>50</sub> values were calculated and are shown in supplemental Table S1 on page S32. Unlike 3, 1 induced antibodies cross-reacted with several other abused opioids, indicating its potential as a broad opioid vaccine.

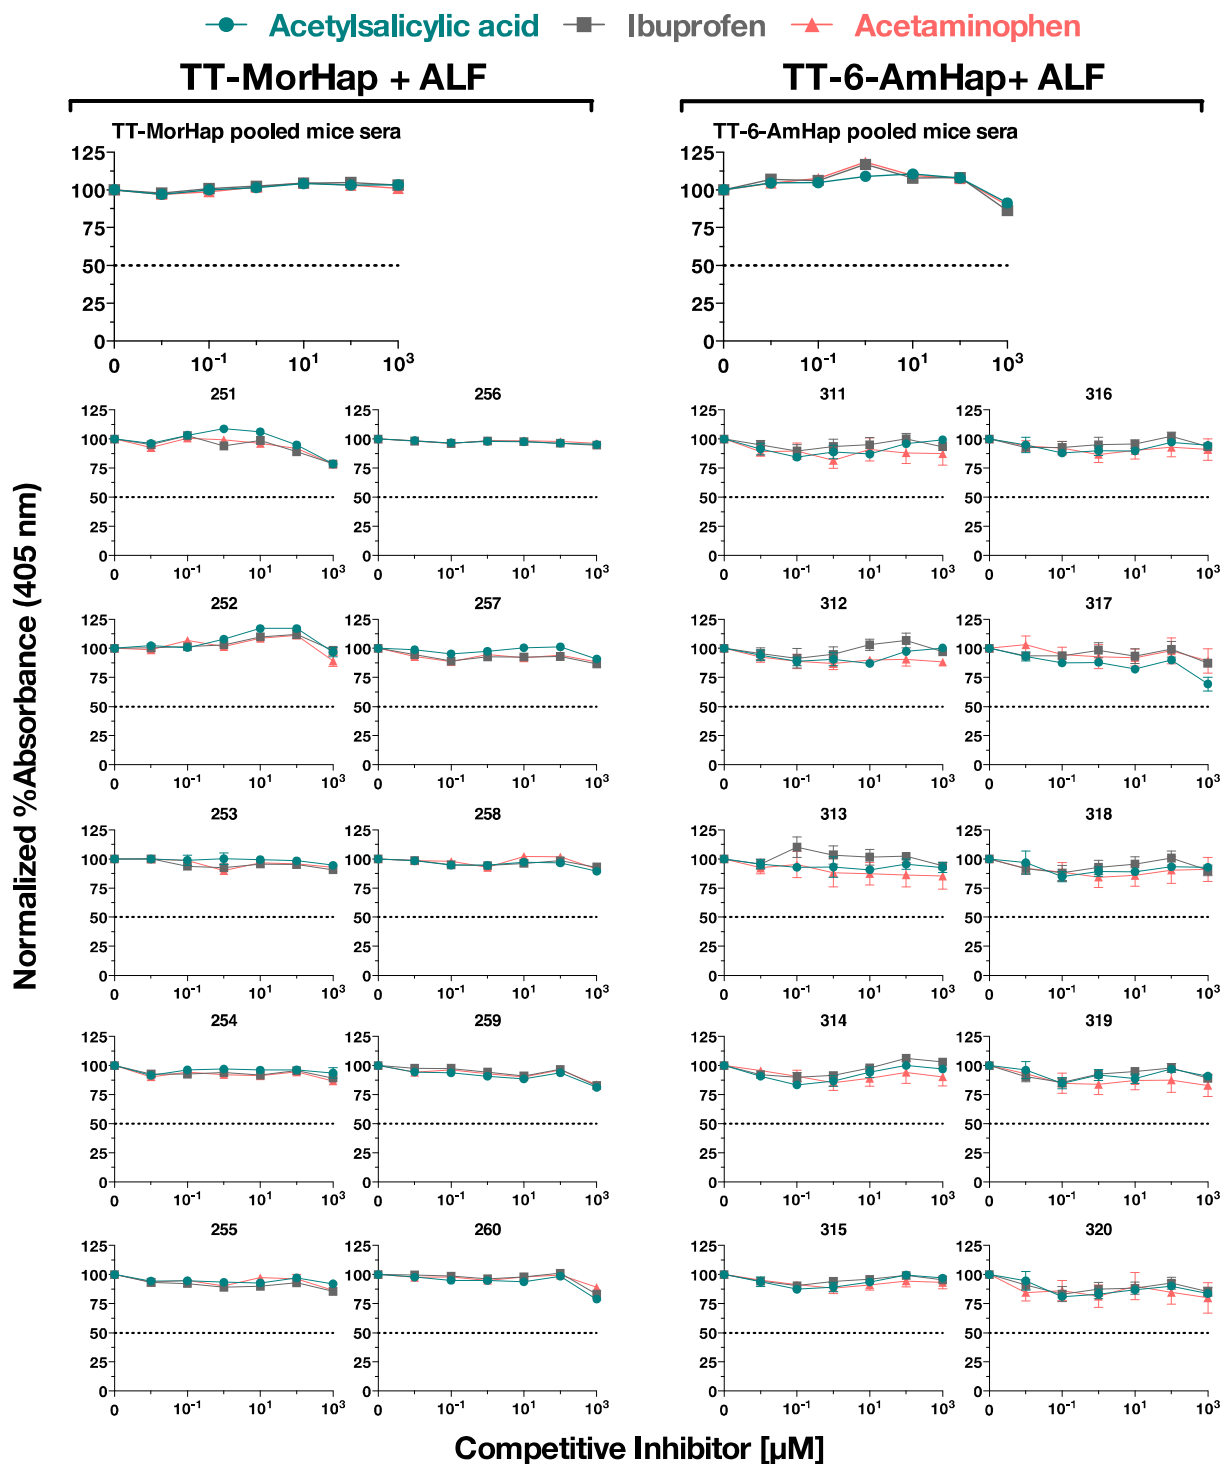

**Figure S10. Competitive inhibition in ELISA for the binding of mouse 1 and 3 induced antibodies by non-narcotic analgesics.** Normalized competition ELISA curves showing Mean  $\pm$  SEM of triplicate determinations from pooled and individual mice sera from week 8 are shown.  $IC_{50}$  for all drugs was  $>1000$  for all samples indicating no binding of the hapten antibodies to these drugs. Hence, these drugs could be used in the immunized individuals for routine pain management.

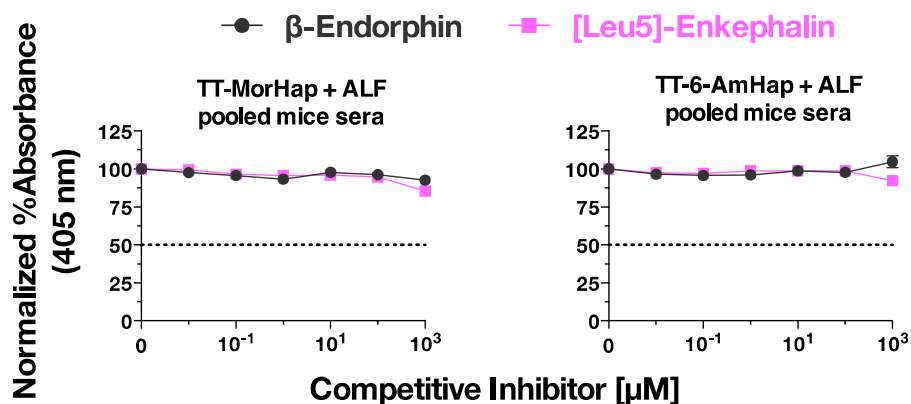

**Figure S11. Competitive inhibition in ELISA for the binding of 1 and 3 induced antibodies by endogenous opioid peptides.** Normalized competition ELISA curves showing Mean  $\pm$  SEM of triplicate determinations from pooled mice sera from week 8 are shown.  $IC_{50}$  for both peptides was  $>1000$  for both groups indicating no binding of the hapten antibodies to these peptides. Hence, the vaccine would not block the effects of these endogenous opioid neuropeptides, which is an essential requirement for any potential heroin vaccine.

● Heroin    ■ 6-Acetylmorphine    ▲ Morphine  
◆ Morphine-3-β-glucuronide    ▼ Morphine-6-β-glucuronide    ● Normorphine

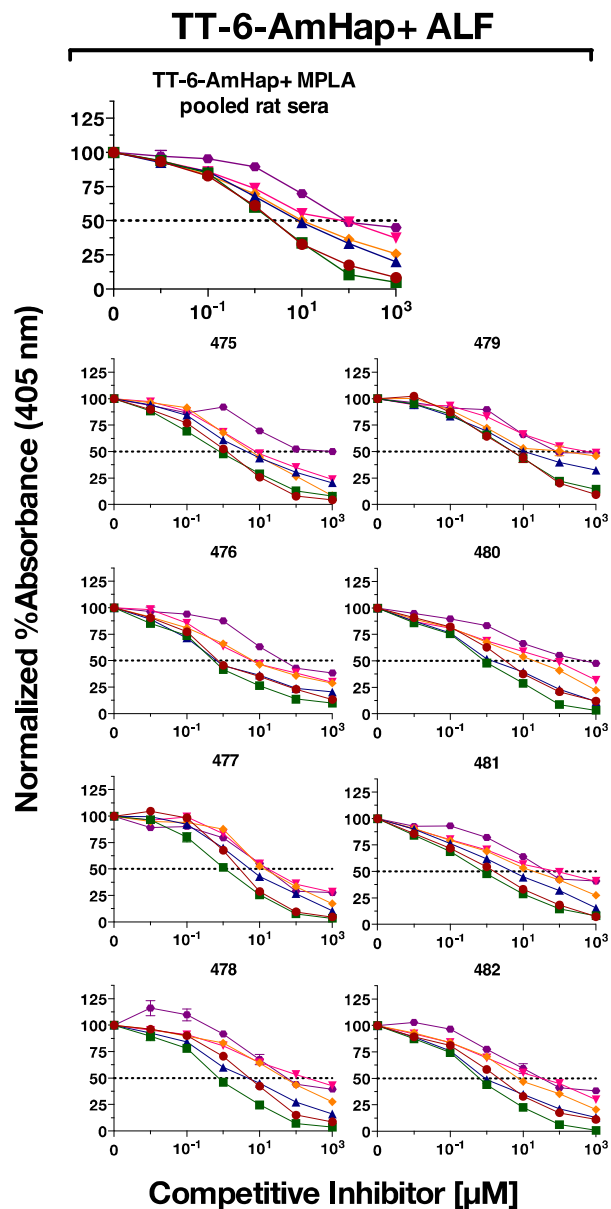

**Figure S12. Competitive inhibition in ELISA for the binding of rat 1 induced antibodies by heroin and its metabolites.** Normalized competition ELISA curves showing Mean  $\pm$  SEM of triplicate determinations from pooled and individual rat sera from week 8 are shown. IC<sub>50</sub> values were calculated and are shown in supplemental Table S2 on page S33. TT-1 with ALF as adjuvant generated antibodies with high affinities for heroin and its active metabolites in rats as well.

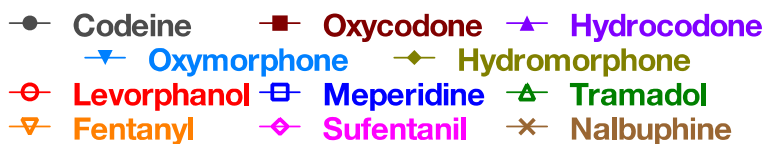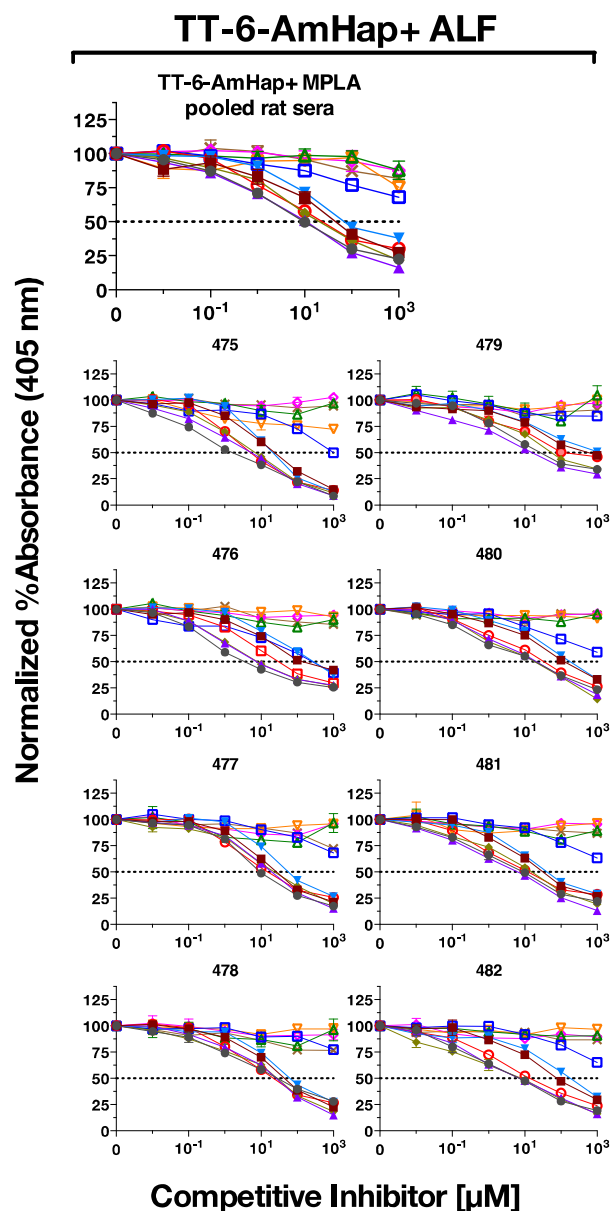

**Figure S13. Competitive inhibition in ELISA for the binding of rat 1 induced antibodies by other abused prescription opioid drugs.** Normalized competition ELISA curves showing Mean  $\pm$  SEM of triplicate determinations from pooled and individual rat sera from week 8 are shown.  $IC_{50}$  values were calculated and are shown in supplemental Table S2 on page S33. As seen for mice, rat 1 induced antibodies also cross-reacted with several other abused opioids, reconfirming their potential as a broad opioid vaccine.



● Methadone    ■ Buprenorphine    ▲ Naloxone    ◆ Naltrexone

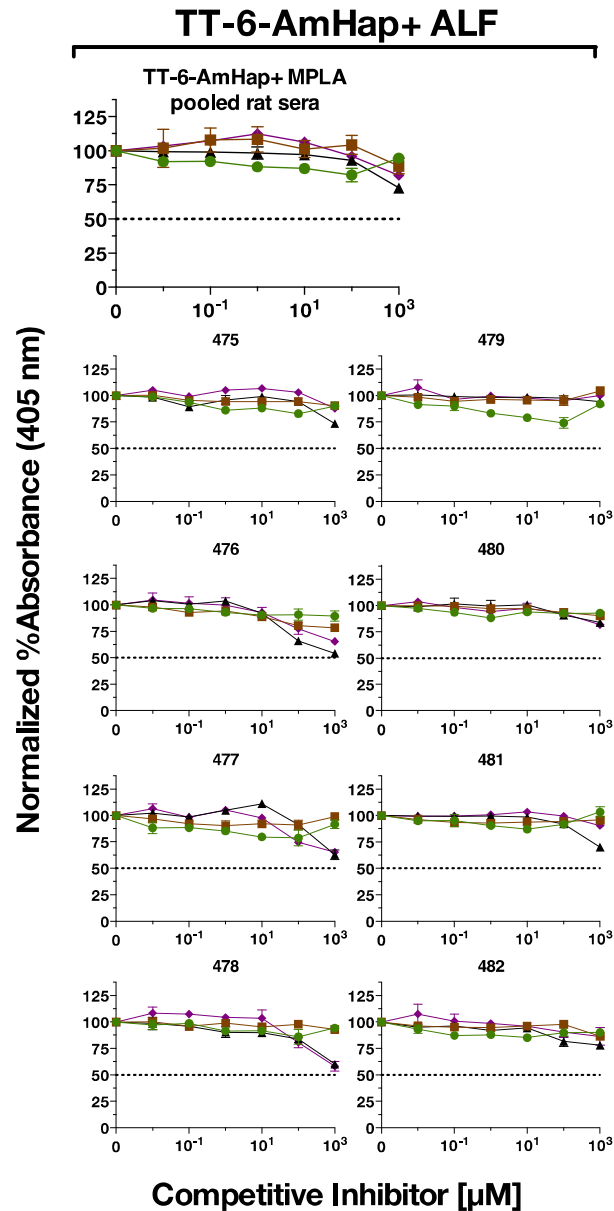

**Figure S14. Competitive inhibition in ELISA for the binding of rat 1 induced antibodies by drugs used for opioid abuse therapy.** Normalized competition ELISA curves showing Mean  $\pm$  SEM of triplicate determinations from pooled and individual rat sera from week 8 are shown. As seen for mice, the  $IC_{50}$  for all drugs was  $>1000$  for all rat samples as well. This reconfirmed that the 1 induced antibodies would not bind and interfere with these drugs used for drug addiction therapy.

● Acetylsalicylic acid   ■ Ibuprofen   ▲ Acetaminophen

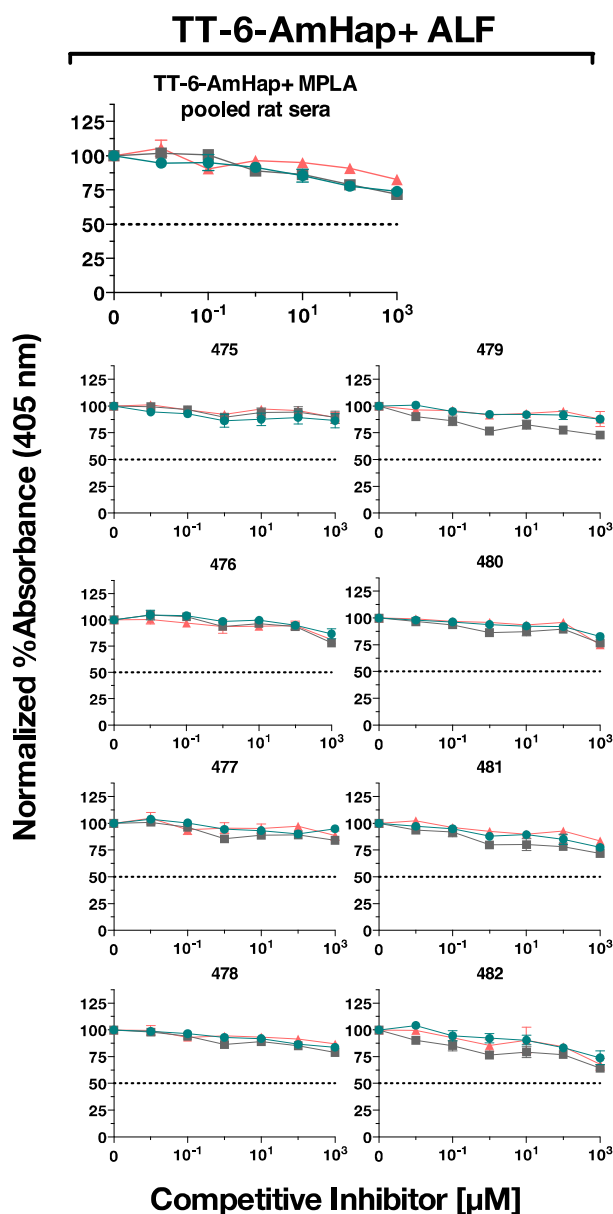

**Figure S15. Competitive inhibition in ELISA for the binding of rat 1 induced antibodies by non-narcotic analgesics.** Normalized competition ELISA curves showing Mean  $\pm$  SEM of triplicate determinations from pooled and individual rat sera from week 8 are shown. As seen for mice, the  $IC_{50}$  for all these drugs was  $>1000$  for all rat samples as well. This reconfirmed that the **1** induced antibodies would not bind these drugs and they could be effectively used in TT-**1** immunized individuals for routine pain management.

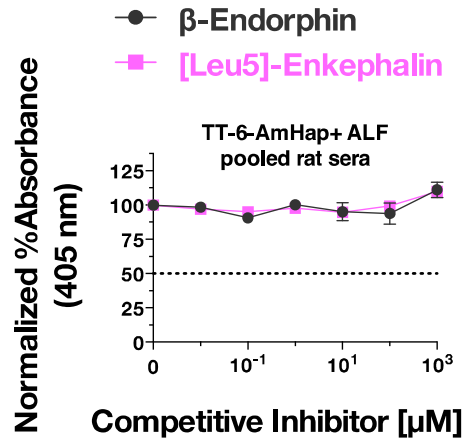

**Figure S16. Competitive inhibition in ELISA for the binding of rat 1 induced antibodies by endogenous opioid peptides.** Normalized competition ELISA curves showing Mean  $\pm$  SEM of triplicate determinations from pooled rat sera from week 8 are shown. As seen for mice, the  $\text{IC}_{50}$  for both peptides was  $>1000$  for rat sera as well indicating no binding of the 1 induced antibodies to these peptides. This reconfirmed that the vaccine would not block the effects of these endogenous opioid neuropeptides in immunized individual

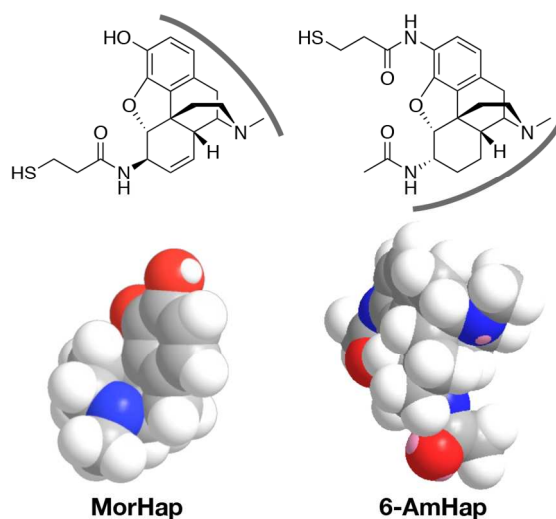

**Figure S17. Facial recognition of 1 (6-AmHap) and 3 (MorHap).** Because of conjugation to TT, the freedom of motion of the hapten is restricted. Consequently, the structure of the hapten structure bifurcates into two immunologically defined “faces”. The “front face” constitutes the functional groups that are exposed to the immune system and the “back face” is the sterically blocked moieties near the conjugation site.<sup>4</sup> The gray arcs indicate the hypothetical front face of **1** and **3** (Top). The space-filling models (ChemBio3D Ultra) show the minimized energy configuration of the haptens (Bottom).

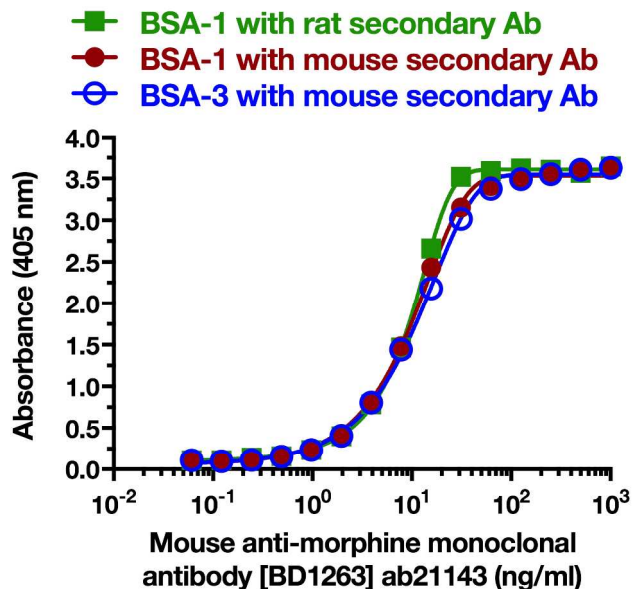

**Figure S18. Comparison of anti-morphine ELISA standard curves using different haptens and secondary antibodies.** ELISA Standard curves were run and compared using BSA-1 or BSA-3 conjugates as the coating antigen with mouse anti-morphine monoclonal antibody (mAb) [BD1263] (Abcam, Cambridge, MA; Cat. No. ab21143) as primary antibody followed by peroxidase linked mouse or rat secondary antibodies (sAb) using ELISA methods as described below. The nonlinear regression curve fit of **3** with mouse sAb and of **1** with mouse or rat sAb were similar ( $p > 0.05$ ) in the linear range (OD 0.2 to 3.2). This allowed for the quantification and mutual comparison of the hapten-specific serum IgG levels for both haptens in mice and rats using the same anti-morphine mAb as shown in Figure 4 and Figure 7.

Binding ELISA was performed as described before.<sup>1,2</sup> The BSA-1 or BSA-3 conjugates for ELISA were prepared using a low BSA to SM(PEG)<sub>2</sub> linker ratio of 1:10 for conjugation which gave low hapten density of ~4 to 5 haptens attached per BSA molecule as measured by MALDI-TOF MS. Low hapten density BSA-hapten conjugates were used for ELISA as they gave lower steric hindrance and optimal antibody binding as reported before<sup>1</sup>. The BSA-1 or BSA-3 conjugate or TT (0.1 µg/0.1 ml/well in PBS) were added to the Nunc MaxiSorp<sup>®</sup> flat-bottom ELISA plates and incubated at 4 °C overnight. The plates were blocked with 1% BSA in TBS (20 mM Tris, 154 mM sodium chloride) for mouse samples or with 0.5% milk, 0.1% Tween-20 in PBS for rat samples at pH 7.4 for 2 h. The blocker was removed and sera, serially diluted in the appropriate blocker in triplicates, were added to the plates. Following incubation for 1 h at room temperature, the plates were washed with TBS, 0.1% Tween-20. Peroxidase linked sheep anti-mouse IgG (The Binding Site, San Diego, CA) or goat anti-rat IgG (Bethyl Laboratories, Inc., Montgomery, TX) diluted in blocker was added and the plates were incubated for 1 h at room temperature. The plates were washed and ABTS substrate (KPL, Inc., Gaithersburg, MD) was added. After 1 h incubation at room temperature, color development was stopped by adding 100 µl/well of 1% SDS and the absorbance was read at 405 nm. Serum IgG concentrations were quantified for both mouse and rat samples using corresponding standard curves of murine anti-morphine mAb BD1263 for both haptens as shown above and mouse anti-TT mAb HYB-278-01 (AbCam) for TT (Figure S4).



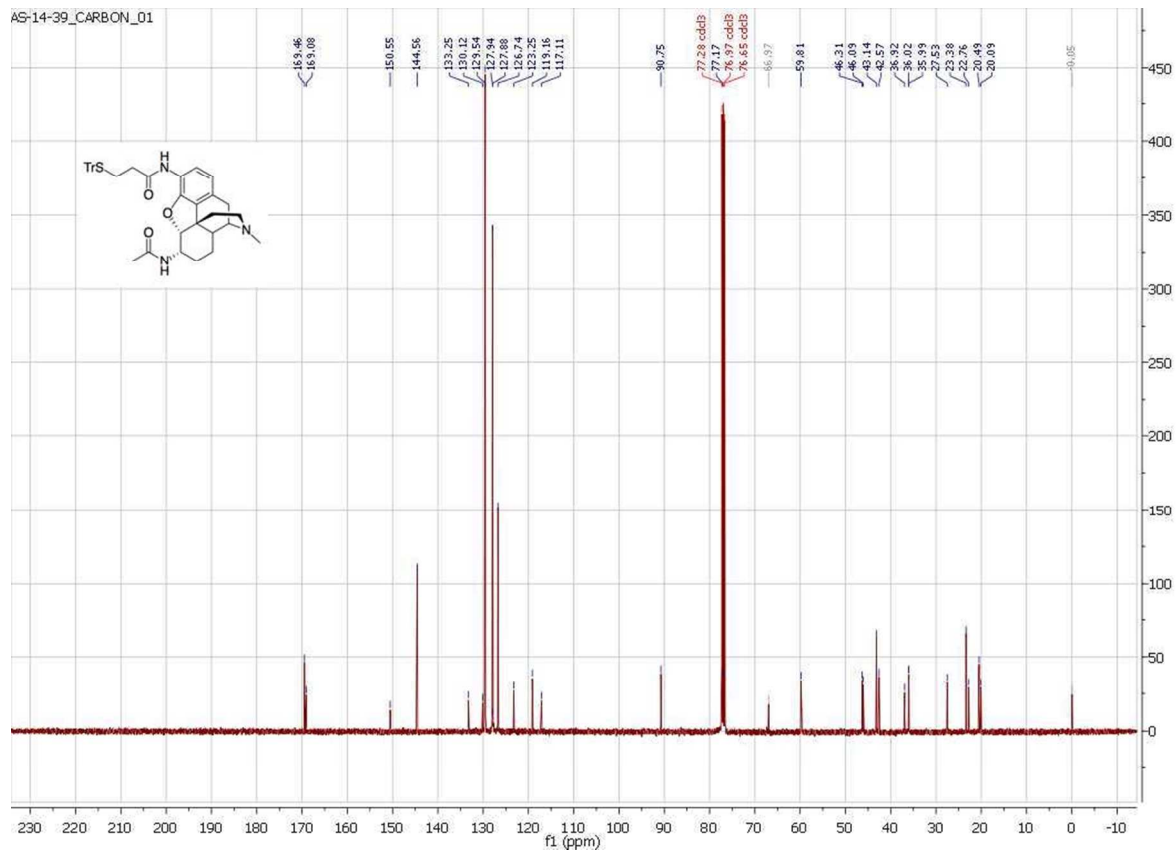

Figure S20.  $^{13}\text{C}$  NMR of 1

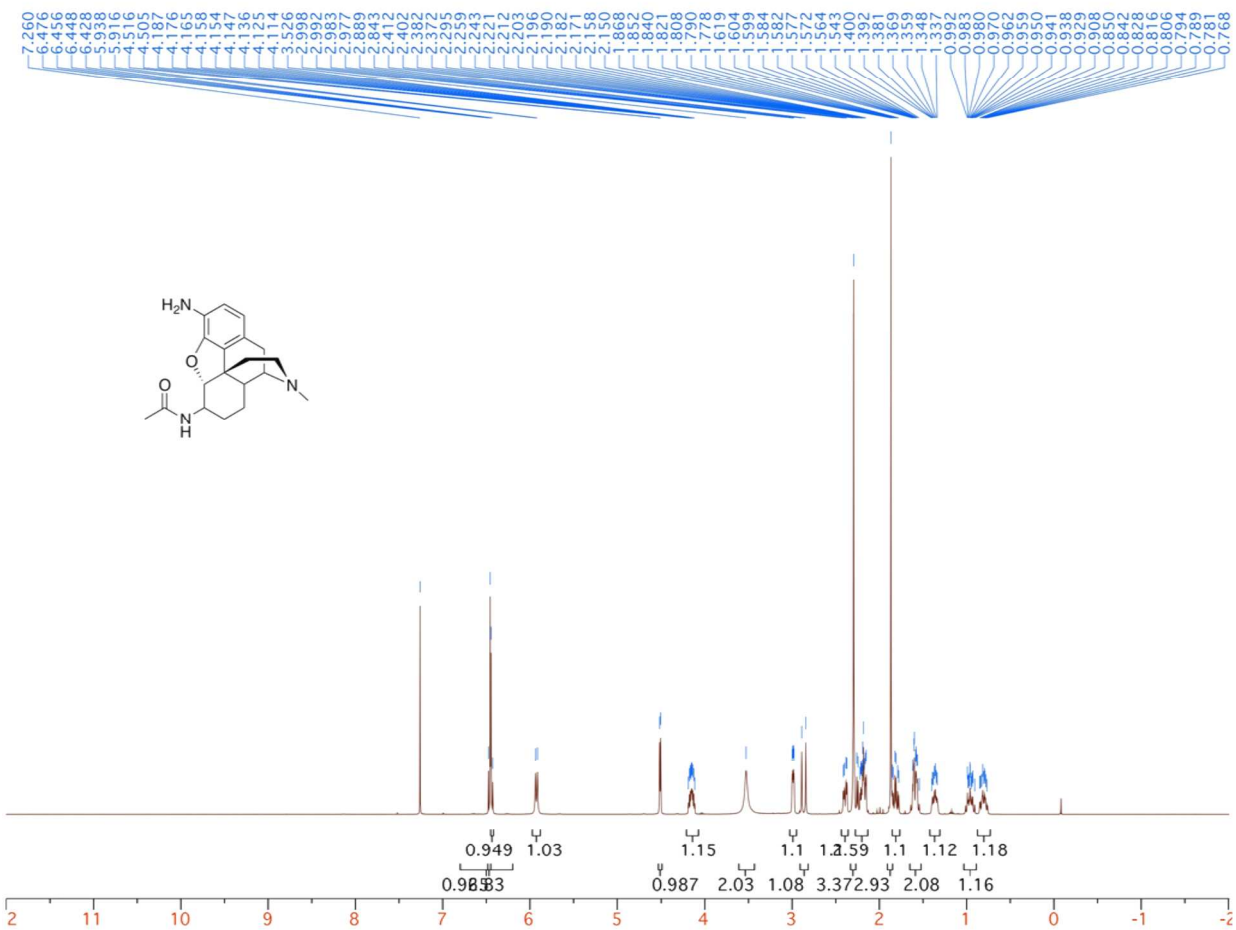

Figure S21.  $^1\text{H}$  NMR of 12



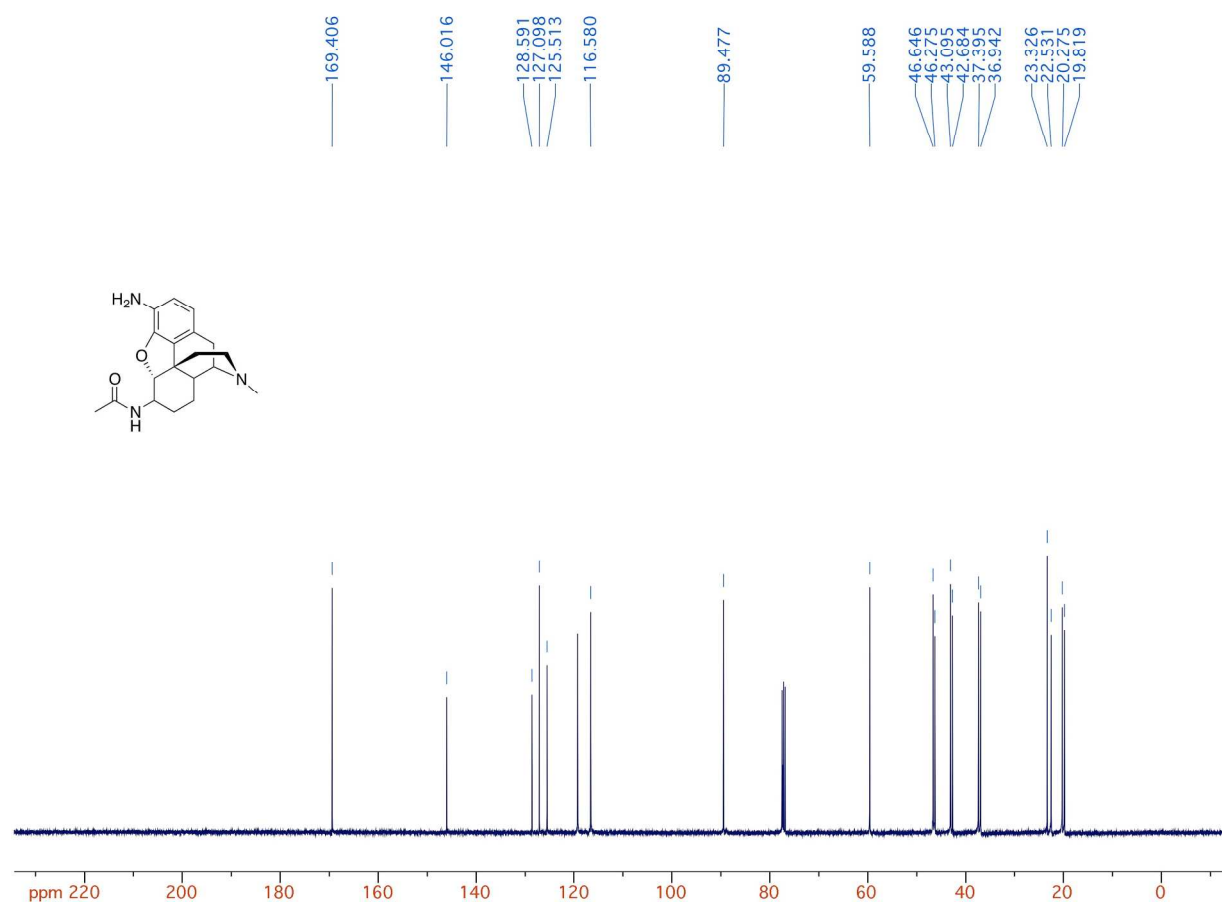

Figure S22.  $^{13}\text{C}$  NMR of 12

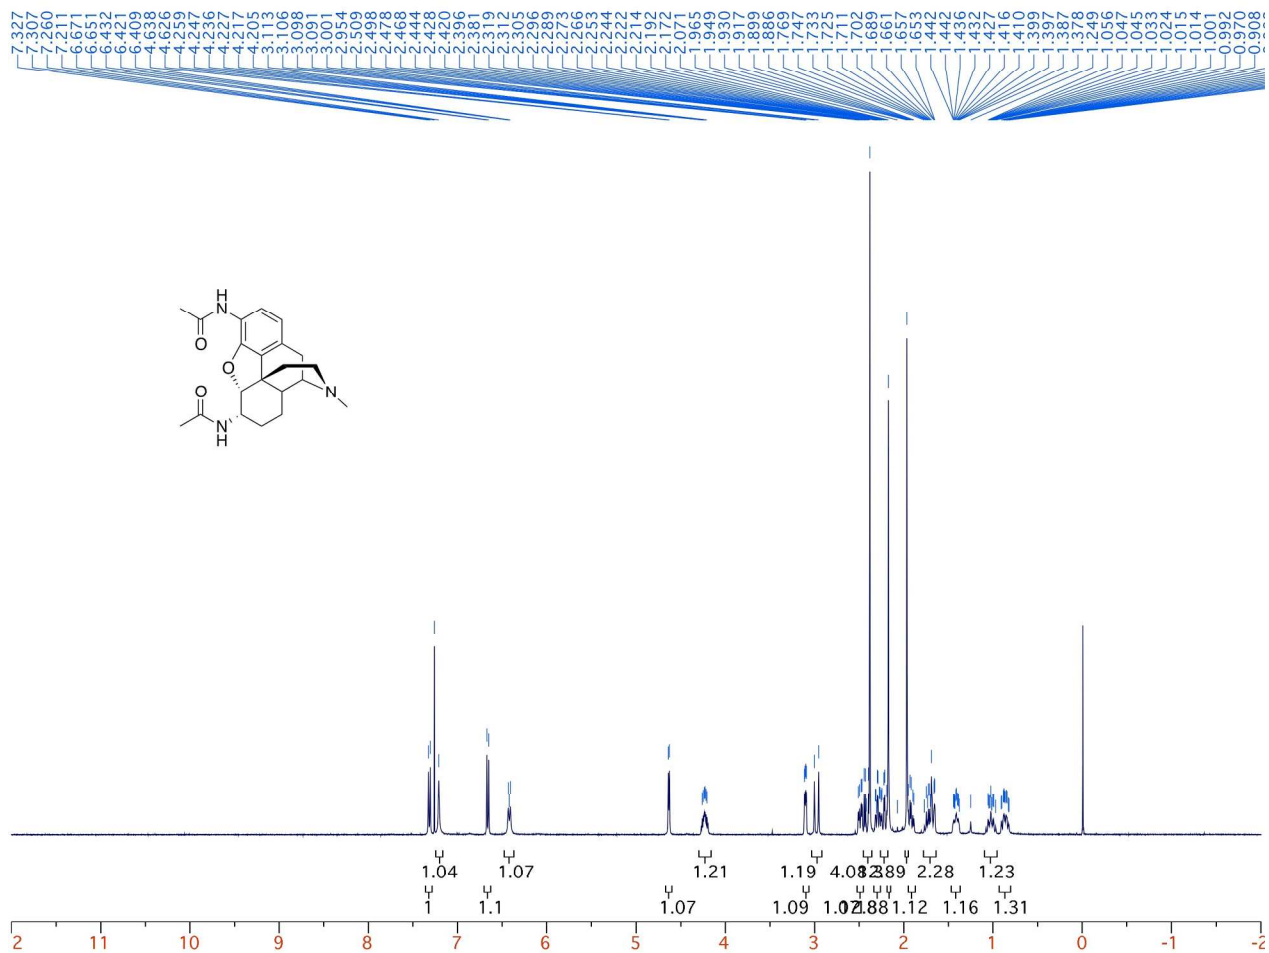

Figure S23. <sup>1</sup>H NMR of 13

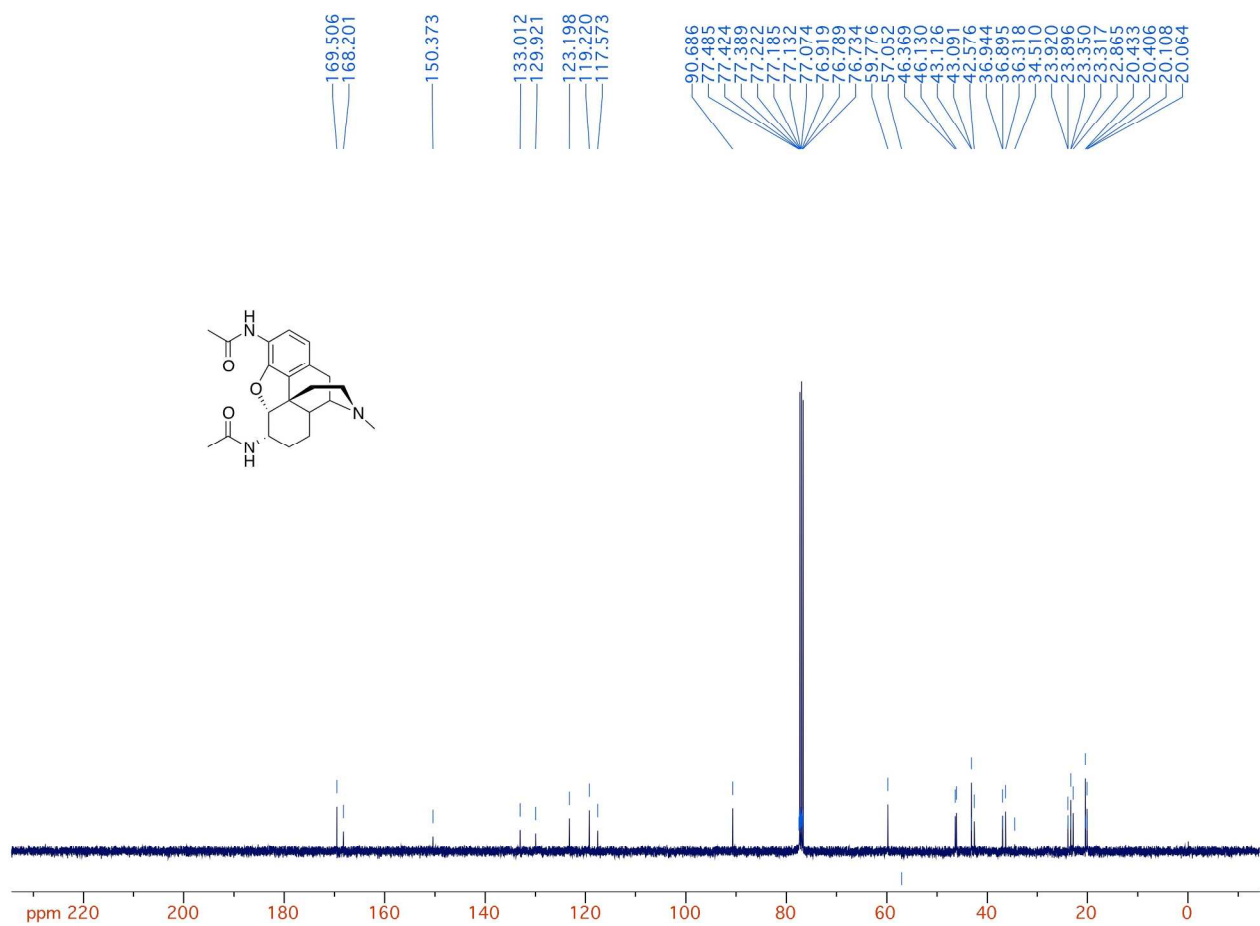

Figure S24.  $^{13}\text{C}$  NMR of 13

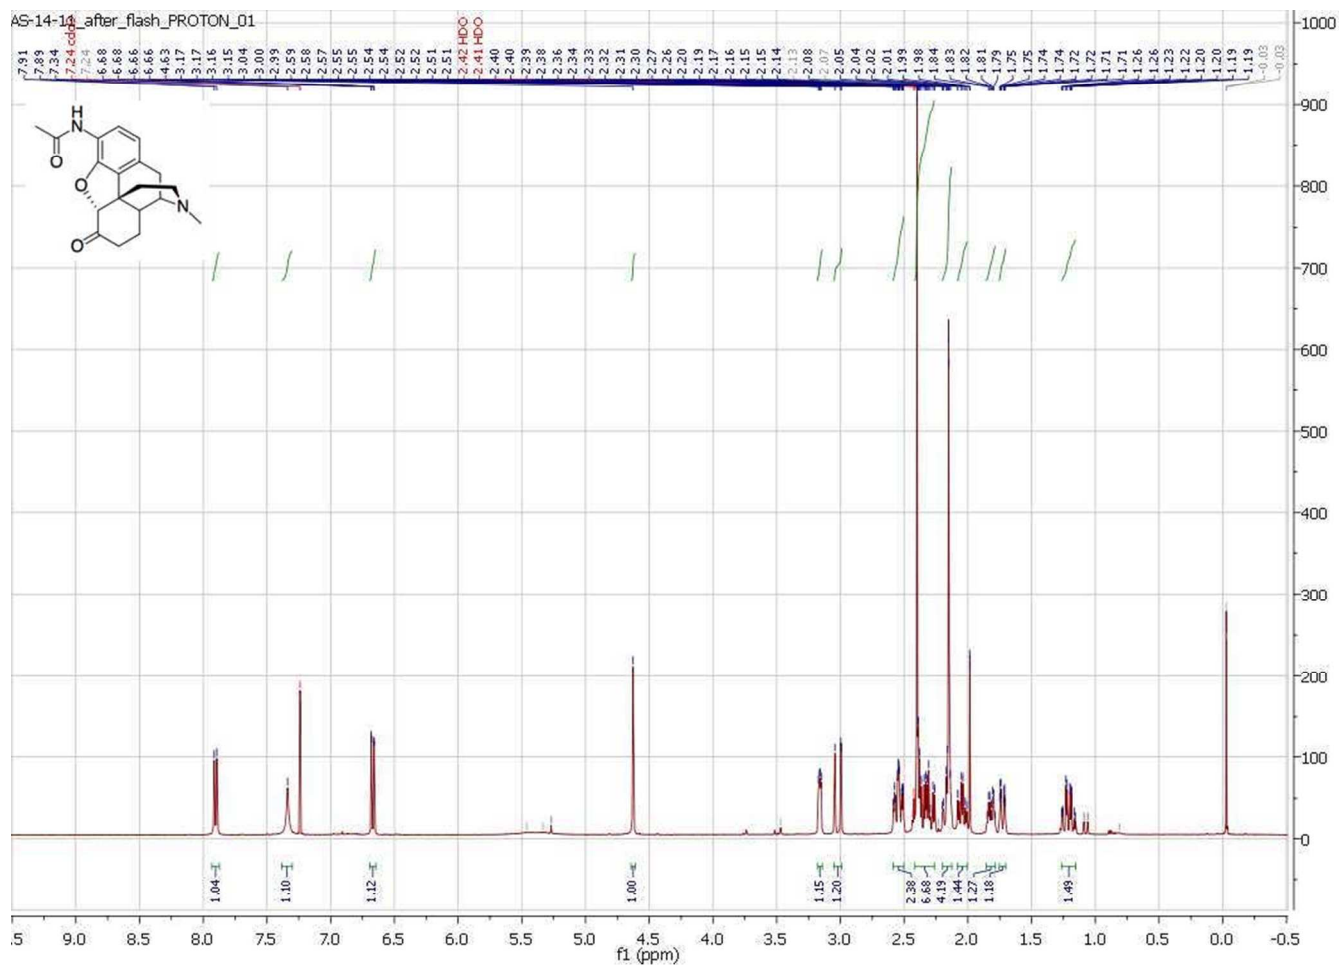

Figure S25. <sup>1</sup>H NMR of 15

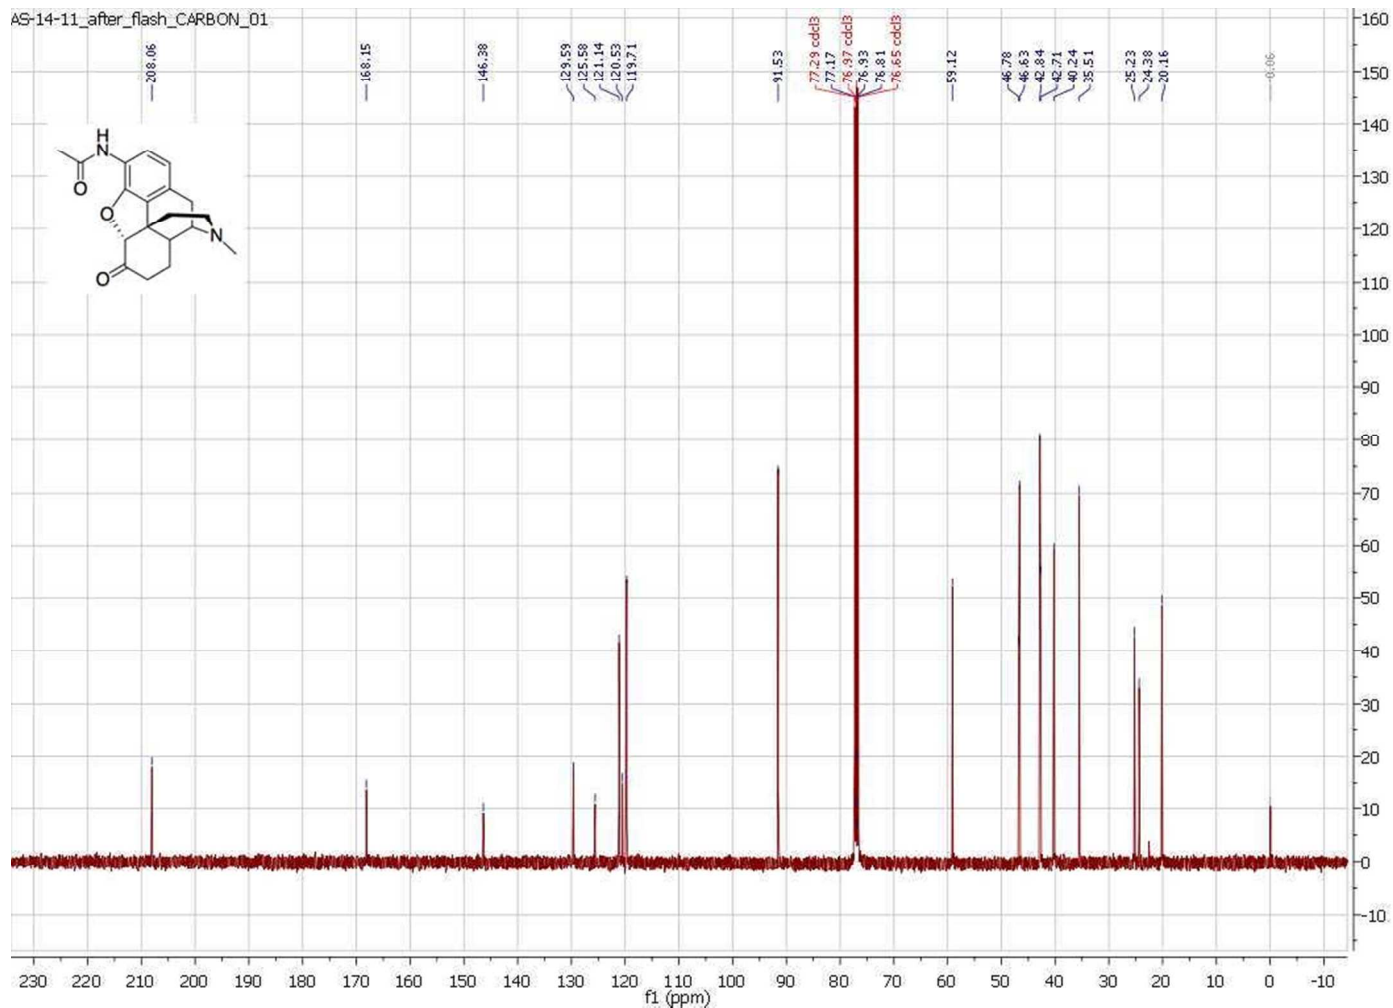

Figure S26.  $^{13}\text{C}$  NMR of 15

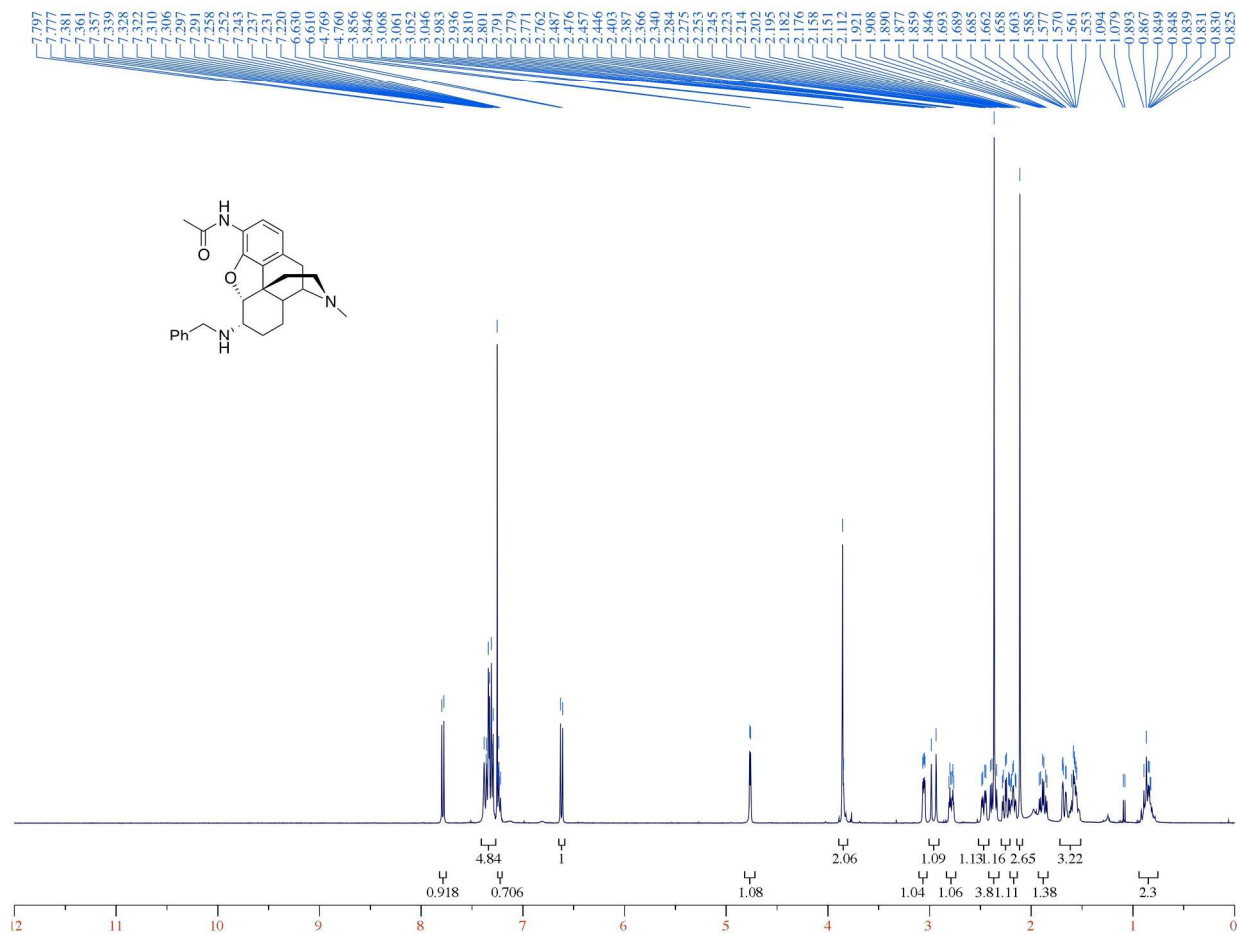

Figure S27.  $^1\text{H}$  NMR of 16

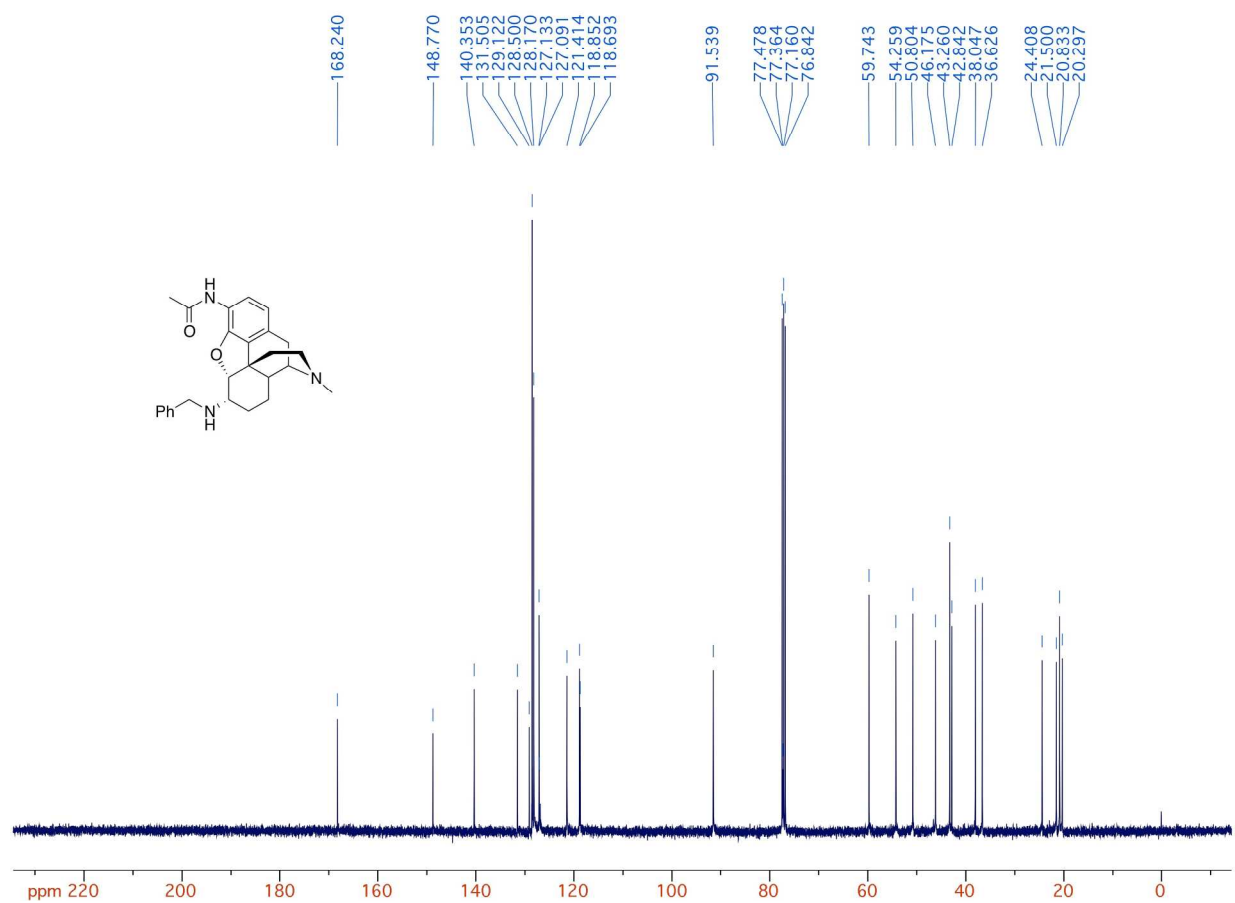

Figure S28. <sup>13</sup>C NMR of 16

**Table S1. Affinity of 1 and 3 induced antibodies (IC<sub>50</sub>; μM) for individual mice measured using competition ELISA<sup>a</sup>**

| Mice Group | Mice ID     | Heroin and its metabolites |        |          |        |        |             | Other abused prescription opioid drugs |           |             |             |               |             |            |          |          |            |            |
|------------|-------------|----------------------------|--------|----------|--------|--------|-------------|----------------------------------------|-----------|-------------|-------------|---------------|-------------|------------|----------|----------|------------|------------|
|            |             | Heroin                     | 6-AM   | Morphine | M-3G   | M-6G   | Normorphine | Codeine                                | Oxycodone | Hydrocodone | Oxymorphone | Hydromorphone | Levorphanol | Meperidine | Tramadol | Fentanyl | Sufentanil | Nalbuphine |
| TT-3 + ALF | Pooled sera | >1000                      | 41.64  | 2.87     | >1000  | 312.50 | 18.37       | >1000                                  | >1000     | >1000       | 66.26       | 13.54         | 3.42        | >1000      | >1000    | >1000    | >1000      | >1000      |
|            | 251         | >1000                      | 164.40 | 28.05    | >1000  | 242.10 | 14.98       | >1000                                  | >1000     | >1000       | 69.70       | 100.50        | 3.52        | >1000      | >1000    | >1000    | >1000      | >1000      |
|            | 252         | >1000                      | 124.50 | 29.87    | >1000  | 190.70 | 13.98       | >1000                                  | >1000     | >1000       | 167.80      | 40.46         | 7.16        | >1000      | >1000    | >1000    | >1000      | >1000      |
|            | 253         | 332.40                     | 14.26  | 3.89     | >1000  | 184.20 | 9.09        | >1000                                  | >1000     | >1000       | 35.22       | 27.58         | 0.50        | >1000      | >1000    | >1000    | >1000      | >1000      |
|            | 254         | >1000                      | 143.20 | 31.72    | >1000  | 804.60 | 33.26       | >1000                                  | >1000     | >1000       | 127.30      | 101.30        | 4.58        | >1000      | >1000    | >1000    | >1000      | >1000      |
|            | 255         | >1000                      | 124.70 | 37.65    | >1000  | 968.50 | 27.55       | >1000                                  | >1000     | >1000       | 290.30      | 23.74         | 51.40       | >1000      | >1000    | >1000    | >1000      | >1000      |
|            | 256         | >1000                      | 153.10 | 50.63    | >1000  | 222.50 | 24.89       | >1000                                  | >1000     | >1000       | 129.80      | 22.23         | 4.46        | >1000      | >1000    | >1000    | >1000      | 901.80     |
|            | 257         | >1000                      | 55.53  | 6.42     | >1000  | 349.70 | 21.84       | >1000                                  | >1000     | >1000       | 103.40      | 207.70        | 12.04       | >1000      | >1000    | >1000    | >1000      | >1000      |
|            | 258         | >1000                      | 77.22  | 21.00    | >1000  | >1000  | 23.26       | >1000                                  | >1000     | >1000       | 102.10      | 20.57         | 10.60       | >1000      | >1000    | >1000    | >1000      | >1000      |
|            | 259         | >1000                      | 97.63  | 20.70    | >1000  | 322.20 | 18.44       | >1000                                  | >1000     | >1000       | 44.48       | 37.83         | 1.30        | >1000      | >1000    | >1000    | >1000      | >1000      |
|            | 260         | >1000                      | 89.24  | 13.34    | >1000  | 414.50 | 9.60        | >1000                                  | >1000     | >1000       | 33.58       | 15.40         | 1.38        | >1000      | >1000    | >1000    | >1000      | >1000      |
| TT-1 + ALF | Pooled sera | 1.58                       | 1.86   | 0.71     | 2.89   | 1.04   | 111.20      | 6.56                                   | 496.00    | 0.88        | 81.88       | 0.95          | 2.84        | 268.80     | >1000    | >1000    | >1000      | >1000      |
|            | 311         | 1.91                       | 7.35   | 3.21     | 0.39   | 0.69   | 73.84       | 3.04                                   | 416.40    | 1.96        | 108.90      | 2.72          | 0.70        | 265.00     | >1000    | >1000    | >1000      | >1000      |
|            | 312         | 2.61                       | 7.00   | 7.62     | 6.85   | 5.34   | 196.40      | 10.30                                  | 824.10    | 5.60        | 213.80      | 2.99          | 6.88        | >1000      | >1000    | >1000    | >1000      | >1000      |
|            | 313         | 1.07                       | 2.00   | 1.09     | 2.53   | 1.44   | 39.82       | 0.34                                   | 134.40    | 1.60        | 75.55       | 2.60          | 0.87        | 191.00     | >1000    | >1000    | >1000      | >1000      |
|            | 314         | 3.62                       | 5.47   | 2.50     | 6.74   | 2.97   | 133.50      | 1.58                                   | 618.10    | 6.91        | 54.57       | 5.00          | 2.36        | 75.87      | >1000    | >1000    | >1000      | >1000      |
|            | 315         | 0.60                       | 1.98   | 2.93     | 10.01  | 5.93   | 267.80      | 12.36                                  | 986.20    | 18.04       | 349.20      | 10.25         | 8.83        | >1000      | >1000    | >1000    | >1000      | >1000      |
|            | 316         | 1.02                       | 4.39   | 1.80     | 13.48  | 2.94   | 107.90      | 3.32                                   | 647.10    | 5.75        | 84.48       | 3.40          | 2.59        | 553.70     | >1000    | 887.10   | >1000      | >1000      |
|            | 317         | 0.50                       | 3.38   | 2.40     | 48.50  | 23.99  | 99.09       | 3.12                                   | 560.20    | 2.68        | 104.80      | 3.02          | 1.38        | 264.20     | >1000    | >1000    | >1000      | >1000      |
|            | 318         | 0.42                       | 1.33   | 0.64     | 29.25  | 19.36  | 60.94       | 0.59                                   | 273.90    | 2.60        | 74.86       | 1.68          | 3.51        | 416.90     | >1000    | >1000    | >1000      | >1000      |
|            | 319         | 0.49                       | 2.77   | 0.65     | 43.32  | 114.20 | 62.28       | 2.76                                   | 410.90    | 3.39        | 69.13       | 2.87          | 6.10        | 335.40     | >1000    | >1000    | >1000      | >1000      |
|            | 320         | 0.42                       | 1.56   | 0.72     | 118.70 | 72.90  | 82.75       | 0.56                                   | 474.60    | 2.03        | 119.60      | 1.40          | 0.67        | 469.80     | >1000    | >1000    | >1000      | >1000      |

<sup>a</sup> Values denote IC<sub>50</sub> for the indicated drugs (μM) measured from triplicate measurements using competition ELISA from pooled and individual mice sera from each group (n=10). IC<sub>50</sub> was defined as the drug concentration that produced 50% inhibition of maximal antibody and hapten binding as calculated from normalized competition curves using log(inhibitor) vs. normalized response-variable slope regression. The Mean ± SEM of IC<sub>50</sub> values for all drugs from each mice group are shown in Table 2.



**Table S2. Affinity of 1 induced antibodies (IC<sub>50</sub>; μM) for individual rats measured using competition ELISA<sup>a</sup>**

| Rat Group  | Rat ID      | Heroin and its metabolites |      |          |        |        |             | Other abused prescription opioid drugs |           |             |             |               |             |            |          |          |            |            |  |
|------------|-------------|----------------------------|------|----------|--------|--------|-------------|----------------------------------------|-----------|-------------|-------------|---------------|-------------|------------|----------|----------|------------|------------|--|
|            |             | Heroin                     | 6-AM | Morphine | M-3G   | M-6G   | Normorphine | Codeine                                | Oxycodone | Hydrocodone | Oxymorphone | Hydromorphone | Levorphanol | Meperidine | Tramadol | Fentanyl | Sufentamil | Nalbuphine |  |
| TT-1 + ALF | Pooled sera | 2.64                       | 2.36 | 11.44    | 16.41  | 71.15  | 226.70      | 12.78                                  | 56.08     | 10.12       | 136.80      | 25.85         | 36.12       | >1000      | >1000    | >1000    | >1000      | >1000      |  |
|            | 475         | 1.14                       | 0.91 | 7.16     | 7.21   | 14.23  | 457.40      | 2.01                                   | 25.32     | 4.57        | 23.36       | 6.97          | 6.92        | >1000      | >1000    | >1000    | >1000      | >1000      |  |
|            | 476         | 1.71                       | 0.75 | 1.72     | 13.12  | 16.06  | 93.87       | 7.31                                   | 231.90    | 14.47       | 273.70      | 14.86         | 44.72       | 282.10     | >1000    | >1000    | >1000      | >1000      |  |
|            | 477         | 3.12                       | 1.26 | 7.55     | 22.08  | 33.12  | 21.84       | 14.05                                  | 33.54     | 21.38       | 81.81       | 27.05         | 24.22       | >1000      | >1000    | >1000    | >1000      | >1000      |  |
|            | 478         | 5.32                       | 0.90 | 5.73     | 56.90  | 205.80 | 123.20      | 33.24                                  | 52.90     | 23.58       | 85.17       | 23.24         | 31.17       | >1000      | >1000    | >1000    | >1000      | >1000      |  |
|            | 479         | 5.36                       | 5.66 | 25.03    | 130.90 | 390.80 | 287.10      | 46.84                                  | 532.30    | 20.69       | 849.10      | 82.85         | 248.00      | >1000      | >1000    | >1000    | >1000      | >1000      |  |
|            | 480         | 3.62                       | 0.98 | 2.30     | 18.25  | 49.21  | 384.70      | 17.25                                  | 143.10    | 19.63       | 185.00      | 15.25         | 36.50       | >1000      | >1000    | >1000    | >1000      | >1000      |  |
|            | 481         | 1.50                       | 0.86 | 5.73     | 23.23  | 91.56  | 107.80      | 9.50                                   | 42.46     | 5.43        | 59.85       | 14.83         | 18.25       | >1000      | >1000    | >1000    | >1000      | >1000      |  |
|            | 482         | 2.33                       | 0.69 | 1.73     | 12.24  | 34.61  | 67.40       | 7.33                                   | 95.22     | 7.76        | 178.90      | 5.61          | 18.86       | >1000      | >1000    | >1000    | >1000      | >1000      |  |

<sup>a</sup> Values denote IC<sub>50</sub> for the indicated drugs (μM) measured from triplicate measurements using competition ELISA from pooled and individual rat sera from each group (n=7-8). IC<sub>50</sub> was defined as the drug concentration that produced 50% inhibition of maximal antibody and hapten binding as calculated from normalized competition curves using log(inhibitor) vs. normalized response-variable slope regression. The Mean ± SEM of IC<sub>50</sub> values for all drugs from the rat group are shown in Table 2.

**Table S3.** Microanalysis (CHN)

| Compound  | Calculated                                                                   |       |      | Found |       |      |      |
|-----------|------------------------------------------------------------------------------|-------|------|-------|-------|------|------|
|           | For                                                                          | C     | H    | N     | C     | H    | N    |
| <b>1</b>  | $C_{41}H_{43}N_3O_3S \cdot tBuOH$                                            | 73.84 | 7.39 | 5.74  | 73.63 | 7.39 | 5.97 |
| <b>15</b> | $C_{19}H_{22}O_3N_2 \cdot oxalic\ acid \cdot H_2O$                           | 58.06 | 6.03 | 6.45  | 58.27 | 6.16 | 6.38 |
| <b>16</b> | $C_{26}H_{31}O_2N_3 \cdot 1.5\ oxalic\ acid \cdot 2\ H_2O \cdot 0.5\ CH_3OH$ | 58.60 | 6.67 | 6.95  | 58.44 | 6.67 | 6.81 |
| <b>19</b> | $C_{24}H_{33}N_3O_4$                                                         | 67.42 | 7.78 | 9.83  | 67.04 | 7.73 | 9.77 |

## Information on X-ray crystal structure deposition

The structures of **19** and **20** were solved and refined with the aid of the program SHELXTL (Bruker). The coordinates for **19** and **20** were deposited at Cambridge Crystallographic Data Centre with deposition numbers CCDC 1553894 and CCDC 1553895, respectively.

**Table S4.** Crystal data and structure refinement for **19**

|                                   |                                                               |                   |
|-----------------------------------|---------------------------------------------------------------|-------------------|
| Empirical formula                 | C <sub>24</sub> H <sub>33</sub> N <sub>3</sub> O <sub>4</sub> |                   |
| Formula weight                    | 427.53                                                        |                   |
| Temperature                       | 149(2) K                                                      |                   |
| Wavelength                        | 1.54178 Å                                                     |                   |
| Crystal system                    | Monoclinic                                                    |                   |
| Space group                       | P2 <sub>1</sub>                                               |                   |
| Unit cell dimensions              | a = 9.5456(4) Å                                               | α = 90°.          |
|                                   | b = 7.6635(3) Å                                               | β = 97.0255(19)°. |
|                                   | c = 15.7025(6) Å                                              | γ = 90°.          |
| Volume                            | 1140.06(8) Å <sup>3</sup>                                     |                   |
| Z                                 | 2                                                             |                   |
| Density (150K)                    | 1.245 Mg/m <sup>3</sup>                                       |                   |
| Absorption coefficient            | 0.687 mm <sup>-1</sup>                                        |                   |
| F(000)                            | 460                                                           |                   |
| Crystal size                      | 0.523 x 0.456 x 0.147 mm <sup>3</sup>                         |                   |
| θ range for data collection       | 4.667 to 72.200°.                                             |                   |
| Index ranges                      | -9<=h<=11, -7<=k<=9, -18<=l<=18                               |                   |
| Reflections collected             | 7047                                                          |                   |
| Independent reflections           | 3615 [R(int) = 0.0272]                                        |                   |
| Completeness to θ = 67.679°       | 94.7 %                                                        |                   |
| Absorption correction             | Semi-empirical from equivalents                               |                   |
| Max. and min. transmission        | 0.7536 and 0.6377                                             |                   |
| Refinement method                 | Full-matrix least-squares on F <sup>2</sup>                   |                   |
| Data / restraints / parameters    | 3615 / 1 / 286                                                |                   |
| Goodness-of-fit on F <sup>2</sup> | 1.011                                                         |                   |
| Final R indices [I>2σ(I)]         | R1 = 0.0311, wR2 = 0.0853                                     |                   |
| R indices (all data)              | R1 = 0.0323, wR2 = 0.0861                                     |                   |
| Absolute structure parameter      | 0.08(6)                                                       |                   |
| Extinction coefficient            | 0.0052(13)                                                    |                   |
| Largest diff. peak and hole       | 0.224 and -0.152 e.Å <sup>-3</sup>                            |                   |

**Table S5.** Atomic coordinates ( $\times 10^4$ ) and equivalent isotropic displacement parameters ( $\text{\AA}^2 \times 10^3$ ) for **19**.  $U(\text{eq})$  is defined as one third of the trace of the orthogonalized  $U^{ij}$  tensor

|       | x        | y        | z       | U(eq) |
|-------|----------|----------|---------|-------|
| C(1)  | 4610(2)  | -3771(3) | 2807(1) | 26(1) |
| C(2)  | 4864(2)  | -2215(3) | 2405(1) | 26(1) |
| C(3)  | 4113(2)  | -681(3)  | 2526(1) | 24(1) |
| C(4)  | 3140(2)  | -780(3)  | 3113(1) | 21(1) |
| O(5)  | 2239(1)  | 516(2)   | 3310(1) | 24(1) |
| C(5)  | 1109(2)  | -351(3)  | 3711(1) | 23(1) |
| C(6)  | -170(2)  | -660(3)  | 3036(1) | 26(1) |
| C(7)  | -48(2)   | -2350(3) | 2531(1) | 29(1) |
| C(8)  | 62(2)    | -3974(3) | 3109(1) | 32(1) |
| C(9)  | 1834(2)  | -5249(3) | 4318(1) | 23(1) |
| C(10) | 3062(2)  | -5510(3) | 3753(1) | 27(1) |
| C(11) | 3580(2)  | -3857(3) | 3381(1) | 23(1) |
| C(12) | 2928(2)  | -2314(3) | 3537(1) | 20(1) |
| C(13) | 1774(2)  | -2061(3) | 4101(1) | 21(1) |
| C(14) | 851(2)   | -3700(3) | 4018(1) | 23(1) |
| C(15) | 2383(2)  | -1820(3) | 5050(1) | 25(1) |
| C(16) | 3169(2)  | -3437(3) | 5412(1) | 26(1) |
| N(17) | 2300(2)  | -5006(2) | 5242(1) | 24(1) |
| C(17) | 3023(2)  | -6530(3) | 5640(2) | 31(1) |
| N(18) | 4360(2)  | 860(2)   | 2062(1) | 27(1) |
| C(19) | 3342(2)  | 1692(3)  | 1550(1) | 26(1) |
| O(19) | 2079(1)  | 1365(2)  | 1480(1) | 37(1) |
| O(20) | 3936(1)  | 2965(2)  | 1117(1) | 28(1) |
| C(21) | 3077(2)  | 4040(3)  | 476(1)  | 30(1) |
| C(22) | 2082(3)  | 5195(4)  | 912(2)  | 40(1) |
| C(23) | 2299(3)  | 2925(4)  | -223(2) | 43(1) |
| C(24) | 4216(3)  | 5137(4)  | 128(2)  | 43(1) |
| N(25) | -339(2)  | 843(3)   | 2458(1) | 30(1) |
| C(26) | -1595(2) | 1478(3)  | 2141(1) | 26(1) |
| O(26) | -2705(2) | 930(3)   | 2361(1) | 43(1) |
| C(27) | -1585(2) | 2938(3)  | 1493(2) | 33(1) |

**Table S6.** Bond lengths [Å] and angles [°] for **19**

|                  |            |                 |            |
|------------------|------------|-----------------|------------|
| C(1)-C(2)        | 1.385(3)   | C(1)-C(11)      | 1.414(3)   |
| C(1)-H(1A)       | 0.9500     | C(2)-C(3)       | 1.402(3)   |
| C(2)-H(2A)       | 0.9500     | C(3)-C(4)       | 1.388(2)   |
| C(3)-N(18)       | 1.422(3)   | C(4)-O(5)       | 1.373(2)   |
| C(4)-C(12)       | 1.378(3)   | O(5)-C(5)       | 1.473(2)   |
| C(5)-C(6)        | 1.534(3)   | C(5)-C(13)      | 1.549(3)   |
| C(5)-H(5A)       | 1.0000     | C(6)-N(25)      | 1.462(3)   |
| C(6)-C(7)        | 1.530(3)   | C(6)-H(6A)      | 1.0000     |
| C(7)-C(8)        | 1.535(3)   | C(7)-H(7A)      | 0.9900     |
| C(7)-H(7B)       | 0.9900     | C(8)-C(14)      | 1.545(3)   |
| C(8)-H(8A)       | 0.9900     | C(8)-H(8B)      | 0.9900     |
| C(9)-N(17)       | 1.477(3)   | C(9)-C(14)      | 1.549(3)   |
| C(9)-C(10)       | 1.566(2)   | C(9)-H(9A)      | 1.0000     |
| C(10)-C(11)      | 1.504(3)   | C(10)-H(10A)    | 0.9900     |
| C(10)-H(10B)     | 0.9900     | C(11)-C(12)     | 1.372(3)   |
| C(12)-C(13)      | 1.508(2)   | C(13)-C(14)     | 1.531(3)   |
| C(13)-C(15)      | 1.544(3)   | C(14)-H(14A)    | 1.0000     |
| C(15)-C(16)      | 1.522(3)   | C(15)-H(15A)    | 0.9900     |
| C(15)-H(15B)     | 0.9900     | C(16)-N(17)     | 1.466(3)   |
| C(16)-H(16A)     | 0.9900     | C(16)-H(16B)    | 0.9900     |
| N(17)-C(17)      | 1.459(3)   | C(17)-H(17A)    | 0.9800     |
| C(17)-H(17B)     | 0.9800     | C(17)-H(17C)    | 0.9800     |
| N(18)-C(19)      | 1.344(3)   | N(18)-H(18A)    | 0.8800     |
| C(19)-O(19)      | 1.223(2)   | C(19)-O(20)     | 1.352(2)   |
| O(20)-C(21)      | 1.471(3)   | C(21)-C(23)     | 1.513(4)   |
| C(21)-C(22)      | 1.520(3)   | C(21)-C(24)     | 1.527(3)   |
| C(22)-H(22A)     | 0.9800     | C(22)-H(22B)    | 0.9800     |
| C(22)-H(22C)     | 0.9800     | C(23)-H(23A)    | 0.9800     |
| C(23)-H(23B)     | 0.9800     | C(23)-H(23C)    | 0.9800     |
| C(24)-H(24A)     | 0.9800     | C(24)-H(24B)    | 0.9800     |
| C(24)-H(24C)     | 0.9800     | N(25)-C(26)     | 1.333(3)   |
| N(25)-H(25A)     | 0.8800     | C(26)-O(26)     | 1.228(2)   |
| C(26)-C(27)      | 1.513(3)   | C(27)-H(27A)    | 0.9800     |
| C(27)-H(27B)     | 0.9800     | C(27)-H(27C)    | 0.9800     |
| C(2)-C(1)-C(11)  | 120.33(18) | C(2)-C(1)-H(1A) | 119.8      |
| C(11)-C(1)-H(1A) | 119.8      | C(1)-C(2)-C(3)  | 122.60(16) |
| C(1)-C(2)-H(2A)  | 118.7      | C(3)-C(2)-H(2A) | 118.7      |
| C(4)-C(3)-C(2)   | 116.06(18) | C(4)-C(3)-N(18) | 123.49(19) |
| C(2)-C(3)-N(18)  | 120.44(16) | O(5)-C(4)-C(12) | 112.00(15) |
| O(5)-C(4)-C(3)   | 126.76(18) | C(12)-C(4)-C(3) | 121.14(18) |
| C(4)-O(5)-C(5)   | 106.38(14) | O(5)-C(5)-C(6)  | 109.64(15) |
| O(5)-C(5)-C(13)  | 105.33(14) | C(6)-C(5)-C(13) | 113.29(16) |
| O(5)-C(5)-H(5A)  | 109.5      | C(6)-C(5)-H(5A) | 109.5      |

**Table S6.** (continued)

---

|                     |            |                     |            |
|---------------------|------------|---------------------|------------|
| C(13)-C(5)-H(5A)    | 109.5      | N(25)-C(6)-C(7)     | 110.81(16) |
| N(25)-C(6)-C(5)     | 109.00(16) | C(7)-C(6)-C(5)      | 112.58(16) |
| N(25)-C(6)-H(6A)    | 108.1      | C(7)-C(6)-H(6A)     | 108.1      |
| C(5)-C(6)-H(6A)     | 108.1      | C(6)-C(7)-C(8)      | 112.60(16) |
| C(6)-C(7)-H(7A)     | 109.1      | C(8)-C(7)-H(7A)     | 109.1      |
| C(6)-C(7)-H(7B)     | 109.1      | C(8)-C(7)-H(7B)     | 109.1      |
| H(7A)-C(7)-H(7B)    | 107.8      | C(7)-C(8)-C(14)     | 115.21(18) |
| C(7)-C(8)-H(8A)     | 108.5      | C(14)-C(8)-H(8A)    | 108.5      |
| C(7)-C(8)-H(8B)     | 108.5      | C(14)-C(8)-H(8B)    | 108.5      |
| H(8A)-C(8)-H(8B)    | 107.5      | N(17)-C(9)-C(14)    | 107.49(16) |
| N(17)-C(9)-C(10)    | 114.55(16) | C(14)-C(9)-C(10)    | 113.15(15) |
| N(17)-C(9)-H(9A)    | 107.1      | C(14)-C(9)-H(9A)    | 107.1      |
| C(10)-C(9)-H(9A)    | 107.1      | C(11)-C(10)-C(9)    | 114.62(16) |
| C(11)-C(10)-H(10A)  | 108.6      | C(9)-C(10)-H(10A)   | 108.6      |
| C(11)-C(10)-H(10B)  | 108.6      | C(9)-C(10)-H(10B)   | 108.6      |
| H(10A)-C(10)-H(10B) | 107.6      | C(12)-C(11)-C(1)    | 116.10(18) |
| C(12)-C(11)-C(10)   | 118.59(15) | C(1)-C(11)-C(10)    | 125.02(18) |
| C(11)-C(12)-C(4)    | 123.50(16) | C(11)-C(12)-C(13)   | 126.55(17) |
| C(4)-C(12)-C(13)    | 109.59(16) | C(12)-C(13)-C(14)   | 107.37(16) |
| C(12)-C(13)-C(15)   | 111.53(15) | C(14)-C(13)-C(15)   | 108.99(15) |
| C(12)-C(13)-C(5)    | 99.81(14)  | C(14)-C(13)-C(5)    | 117.19(15) |
| C(15)-C(13)-C(5)    | 111.57(16) | C(13)-C(14)-C(8)    | 113.62(16) |
| C(13)-C(14)-C(9)    | 106.38(15) | C(8)-C(14)-C(9)     | 112.69(17) |
| C(13)-C(14)-H(14A)  | 108.0      | C(8)-C(14)-H(14A)   | 108.0      |
| C(9)-C(14)-H(14A)   | 108.0      | C(16)-C(15)-C(13)   | 111.86(16) |
| C(16)-C(15)-H(15A)  | 109.2      | C(13)-C(15)-H(15A)  | 109.2      |
| C(16)-C(15)-H(15B)  | 109.2      | C(13)-C(15)-H(15B)  | 109.2      |
| H(15A)-C(15)-H(15B) | 107.9      | N(17)-C(16)-C(15)   | 110.96(16) |
| N(17)-C(16)-H(16A)  | 109.4      | C(15)-C(16)-H(16A)  | 109.4      |
| N(17)-C(16)-H(16B)  | 109.4      | C(15)-C(16)-H(16B)  | 109.4      |
| H(16A)-C(16)-H(16B) | 108.0      | C(17)-N(17)-C(16)   | 110.55(16) |
| C(17)-N(17)-C(9)    | 112.99(17) | C(16)-N(17)-C(9)    | 112.21(15) |
| N(17)-C(17)-H(17A)  | 109.5      | N(17)-C(17)-H(17B)  | 109.5      |
| H(17A)-C(17)-H(17B) | 109.5      | N(17)-C(17)-H(17C)  | 109.5      |
| H(17A)-C(17)-H(17C) | 109.5      | H(17B)-C(17)-H(17C) | 109.5      |
| C(19)-N(18)-C(3)    | 123.20(16) | C(19)-N(18)-H(18A)  | 118.4      |
| C(3)-N(18)-H(18A)   | 118.4      | O(19)-C(19)-N(18)   | 126.11(18) |
| O(19)-C(19)-O(20)   | 124.86(19) | N(18)-C(19)-O(20)   | 109.03(16) |
| C(19)-O(20)-C(21)   | 121.04(15) | O(20)-C(21)-C(23)   | 111.3(2)   |
| O(20)-C(21)-C(22)   | 110.15(17) | C(23)-C(21)-C(22)   | 112.18(19) |
| O(20)-C(21)-C(24)   | 101.07(17) | C(23)-C(21)-C(24)   | 110.99(19) |
| C(22)-C(21)-C(24)   | 110.6(2)   | C(21)-C(22)-H(22A)  | 109.5      |
| C(21)-C(22)-H(22B)  | 109.5      | H(22A)-C(22)-H(22B) | 109.5      |

**Table S6.** (continued)

---

|                     |            |                     |            |
|---------------------|------------|---------------------|------------|
| C(21)-C(22)-H(22C)  | 109.5      | H(22A)-C(22)-H(22C) | 109.5      |
| H(22B)-C(22)-H(22C) | 109.5      | C(21)-C(23)-H(23A)  | 109.5      |
| C(21)-C(23)-H(23B)  | 109.5      | H(23A)-C(23)-H(23B) | 109.5      |
| C(21)-C(23)-H(23C)  | 109.5      | H(23A)-C(23)-H(23C) | 109.5      |
| H(23B)-C(23)-H(23C) | 109.5      | C(21)-C(24)-H(24A)  | 109.5      |
| C(21)-C(24)-H(24B)  | 109.5      | H(24A)-C(24)-H(24B) | 109.5      |
| C(21)-C(24)-H(24C)  | 109.5      | H(24A)-C(24)-H(24C) | 109.5      |
| H(24B)-C(24)-H(24C) | 109.5      | C(26)-N(25)-C(6)    | 123.09(16) |
| C(26)-N(25)-H(25A)  | 118.5      | C(6)-N(25)-H(25A)   | 118.5      |
| O(26)-C(26)-N(25)   | 122.5(2)   | O(26)-C(26)-C(27)   | 121.22(18) |
| N(25)-C(26)-C(27)   | 116.27(17) | C(26)-C(27)-H(27A)  | 109.5      |
| C(26)-C(27)-H(27B)  | 109.5      | H(27A)-C(27)-H(27B) | 109.5      |
| C(26)-C(27)-H(27C)  | 109.5      | H(27A)-C(27)-H(27C) | 109.5      |
| H(27B)-C(27)-H(27C) | 109.5      |                     |            |

---

**Table S7.** Anisotropic displacement parameters ( $\text{\AA}^2 \times 10^3$ ) for **19**. The anisotropic displacement factor exponent takes the form:  $-2 \pi^2 [h^2 a^{*2} U^{11} + \dots + 2 h k a^* b^* U^{12}]$

|       | U11   | U22   | U33   | U23   | U13   | U12   |
|-------|-------|-------|-------|-------|-------|-------|
| C(1)  | 26(1) | 26(1) | 26(1) | -3(1) | 5(1)  | 4(1)  |
| C(2)  | 22(1) | 34(1) | 23(1) | 0(1)  | 4(1)  | 0(1)  |
| C(3)  | 19(1) | 27(1) | 25(1) | 5(1)  | -1(1) | -4(1) |
| C(4)  | 17(1) | 21(1) | 25(1) | -1(1) | -2(1) | -3(1) |
| O(5)  | 20(1) | 19(1) | 33(1) | 4(1)  | 4(1)  | -1(1) |
| C(5)  | 22(1) | 21(1) | 28(1) | 2(1)  | 7(1)  | 1(1)  |
| C(6)  | 18(1) | 28(1) | 32(1) | 9(1)  | 5(1)  | 1(1)  |
| C(7)  | 26(1) | 32(1) | 27(1) | 3(1)  | -5(1) | -5(1) |
| C(8)  | 32(1) | 27(1) | 33(1) | 2(1)  | -7(1) | -8(1) |
| C(9)  | 25(1) | 18(1) | 27(1) | 2(1)  | 4(1)  | -4(1) |
| C(10) | 35(1) | 18(1) | 29(1) | -1(1) | 7(1)  | 1(1)  |
| C(11) | 25(1) | 21(1) | 21(1) | -1(1) | 0(1)  | 0(1)  |
| C(12) | 20(1) | 21(1) | 20(1) | -1(1) | 0(1)  | -2(1) |
| C(13) | 22(1) | 20(1) | 22(1) | 0(1)  | 2(1)  | 1(1)  |
| C(14) | 22(1) | 22(1) | 25(1) | 4(1)  | 1(1)  | -3(1) |
| C(15) | 28(1) | 24(1) | 24(1) | -2(1) | 4(1)  | 0(1)  |
| C(16) | 26(1) | 30(1) | 22(1) | 0(1)  | 1(1)  | -2(1) |
| N(17) | 24(1) | 24(1) | 24(1) | 6(1)  | 2(1)  | 1(1)  |
| C(17) | 28(1) | 30(1) | 34(1) | 10(1) | 3(1)  | 4(1)  |
| N(18) | 14(1) | 32(1) | 34(1) | 12(1) | 1(1)  | -4(1) |
| C(19) | 21(1) | 33(1) | 25(1) | 6(1)  | 3(1)  | -2(1) |
| O(19) | 18(1) | 52(1) | 38(1) | 18(1) | 0(1)  | -4(1) |
| O(20) | 21(1) | 33(1) | 29(1) | 12(1) | 2(1)  | 0(1)  |
| C(21) | 30(1) | 34(1) | 26(1) | 9(1)  | 2(1)  | 4(1)  |
| C(22) | 36(1) | 42(1) | 41(1) | 5(1)  | 2(1)  | 9(1)  |
| C(23) | 44(1) | 53(2) | 30(1) | 5(1)  | -3(1) | 4(1)  |
| C(24) | 42(1) | 44(2) | 44(1) | 21(1) | 12(1) | 1(1)  |
| N(25) | 17(1) | 31(1) | 42(1) | 14(1) | 6(1)  | 1(1)  |
| C(26) | 19(1) | 28(1) | 31(1) | 1(1)  | 0(1)  | -1(1) |
| O(26) | 17(1) | 59(1) | 53(1) | 22(1) | 1(1)  | -1(1) |
| C(27) | 29(1) | 29(1) | 38(1) | 6(1)  | -8(1) | -3(1) |



**Table S8.** Hydrogen coordinates ( $\times 10^4$ ) and isotropic displacement parameters ( $\text{\AA}^2 \times 10^3$ ) for **19**

|        | x     | y     | z    | U(eq) |
|--------|-------|-------|------|-------|
| H(1A)  | 5130  | -4787 | 2697 | 31    |
| H(2A)  | 5576  | -2186 | 2032 | 32    |
| H(5A)  | 824   | 403   | 4180 | 28    |
| H(6A)  | -1030 | -744  | 3339 | 31    |
| H(7A)  | 798   | -2285 | 2225 | 35    |
| H(7B)  | -885  | -2465 | 2096 | 35    |
| H(8A)  | 547   | -4905 | 2821 | 38    |
| H(8B)  | -904  | -4391 | 3164 | 38    |
| H(9A)  | 1244  | -6330 | 4259 | 28    |
| H(10A) | 3864  | -6076 | 4108 | 32    |
| H(10B) | 2736  | -6315 | 3277 | 32    |
| H(14A) | 131   | -3589 | 4426 | 28    |
| H(15A) | 3036  | -811  | 5101 | 30    |
| H(15B) | 1603  | -1561 | 5393 | 30    |
| H(16A) | 4053  | -3569 | 5148 | 31    |
| H(16B) | 3423  | -3299 | 6038 | 31    |
| H(17A) | 3185  | -6364 | 6264 | 46    |
| H(17B) | 3930  | -6681 | 5417 | 46    |
| H(17C) | 2439  | -7570 | 5508 | 46    |
| H(18A) | 5221  | 1289  | 2113 | 32    |
| H(22A) | 1399  | 4464  | 1166 | 60    |
| H(22B) | 1579  | 5982  | 488  | 60    |
| H(22C) | 2626  | 5882  | 1364 | 60    |
| H(23A) | 1583  | 2226  | 16   | 64    |
| H(23B) | 2970  | 2149  | -460 | 64    |
| H(23C) | 1842  | 3678  | -680 | 64    |
| H(24A) | 4854  | 4371  | -143 | 64    |
| H(24B) | 4753  | 5776  | 601  | 64    |
| H(24C) | 3772  | 5967  | -297 | 64    |
| H(25A) | 424   | 1351  | 2314 | 36    |
| H(27A) | -2551 | 3160  | 1226 | 50    |
| H(27B) | -996  | 2602  | 1051 | 50    |
| H(27C) | -1203 | 3998  | 1783 | 50    |

**Table S9.** Torsion angles [°] for **19**

|                         |             |                         |             |
|-------------------------|-------------|-------------------------|-------------|
| C(11)-C(1)-C(2)-C(3)    | -1.3(3)     | C(1)-C(2)-C(3)-C(4)     | 3.3(3)      |
| C(1)-C(2)-C(3)-N(18)    | -176.52(19) | C(2)-C(3)-C(4)-O(5)     | -176.76(19) |
| N(18)-C(3)-C(4)-O(5)    | 3.0(3)      | C(2)-C(3)-C(4)-C(12)    | -0.7(3)     |
| N(18)-C(3)-C(4)-C(12)   | 179.06(18)  | C(12)-C(4)-O(5)-C(5)    | -15.8(2)    |
| C(3)-C(4)-O(5)-C(5)     | 160.54(19)  | C(4)-O(5)-C(5)-C(6)     | -96.68(17)  |
| C(4)-O(5)-C(5)-C(13)    | 25.54(19)   | O(5)-C(5)-C(6)-N(25)    | -38.3(2)    |
| C(13)-C(5)-C(6)-N(25)   | -155.65(15) | O(5)-C(5)-C(6)-C(7)     | 85.06(18)   |
| C(13)-C(5)-C(6)-C(7)    | -32.3(2)    | N(25)-C(6)-C(7)-C(8)    | -177.29(17) |
| C(5)-C(6)-C(7)-C(8)     | 60.4(2)     | C(6)-C(7)-C(8)-C(14)    | -33.4(2)    |
| N(17)-C(9)-C(10)-C(11)  | -92.0(2)    | C(14)-C(9)-C(10)-C(11)  | 31.7(2)     |
| C(2)-C(1)-C(11)-C(12)   | -3.2(3)     | C(2)-C(1)-C(11)-C(10)   | 170.5(2)    |
| C(9)-C(10)-C(11)-C(12)  | -2.0(3)     | C(9)-C(10)-C(11)-C(1)   | -175.56(19) |
| C(1)-C(11)-C(12)-C(4)   | 5.8(3)      | C(10)-C(11)-C(12)-C(4)  | -168.30(19) |
| C(1)-C(11)-C(12)-C(13)  | 178.29(18)  | C(10)-C(11)-C(12)-C(13) | 4.2(3)      |
| O(5)-C(4)-C(12)-C(11)   | 172.58(17)  | C(3)-C(4)-C(12)-C(11)   | -4.0(3)     |
| O(5)-C(4)-C(12)-C(13)   | -1.0(2)     | C(3)-C(4)-C(12)-C(13)   | -177.56(17) |
| C(11)-C(12)-C(13)-C(14) | -34.6(3)    | C(4)-C(12)-C(13)-C(14)  | 138.74(17)  |
| C(11)-C(12)-C(13)-C(15) | 84.7(2)     | C(4)-C(12)-C(13)-C(15)  | -101.92(19) |
| C(11)-C(12)-C(13)-C(5)  | -157.27(19) | C(4)-C(12)-C(13)-C(5)   | 16.06(19)   |
| O(5)-C(5)-C(13)-C(12)   | -24.55(18)  | C(6)-C(5)-C(13)-C(12)   | 95.28(17)   |
| O(5)-C(5)-C(13)-C(14)   | -139.99(16) | C(6)-C(5)-C(13)-C(14)   | -20.2(2)    |
| O(5)-C(5)-C(13)-C(15)   | 93.40(17)   | C(6)-C(5)-C(13)-C(15)   | -146.77(15) |
| C(12)-C(13)-C(14)-C(8)  | -64.9(2)    | C(15)-C(13)-C(14)-C(8)  | 174.15(16)  |
| C(5)-C(13)-C(14)-C(8)   | 46.3(2)     | C(12)-C(13)-C(14)-C(9)  | 59.66(19)   |
| C(15)-C(13)-C(14)-C(9)  | -61.29(18)  | C(5)-C(13)-C(14)-C(9)   | 170.84(16)  |
| C(7)-C(8)-C(14)-C(13)   | -18.0(2)    | C(7)-C(8)-C(14)-C(9)    | -139.06(18) |
| N(17)-C(9)-C(14)-C(13)  | 65.95(17)   | C(10)-C(9)-C(14)-C(13)  | -61.5(2)    |
| N(17)-C(9)-C(14)-C(8)   | -168.92(15) | C(10)-C(9)-C(14)-C(8)   | 63.6(2)     |
| C(12)-C(13)-C(15)-C(16) | -63.6(2)    | C(14)-C(13)-C(15)-C(16) | 54.8(2)     |
| C(5)-C(13)-C(15)-C(16)  | -174.22(15) | C(13)-C(15)-C(16)-N(17) | -51.0(2)    |
| C(15)-C(16)-N(17)-C(17) | -176.13(16) | C(15)-C(16)-N(17)-C(9)  | 56.7(2)     |
| C(14)-C(9)-N(17)-C(17)  | 169.53(15)  | C(10)-C(9)-N(17)-C(17)  | -63.8(2)    |
| C(14)-C(9)-N(17)-C(16)  | -64.66(19)  | C(10)-C(9)-N(17)-C(16)  | 62.0(2)     |
| C(4)-C(3)-N(18)-C(19)   | -57.7(3)    | C(2)-C(3)-N(18)-C(19)   | 122.1(2)    |
| C(3)-N(18)-C(19)-O(19)  | 7.8(3)      | C(3)-N(18)-C(19)-O(20)  | -172.20(18) |
| O(19)-C(19)-O(20)-C(21) | -2.9(3)     | N(18)-C(19)-O(20)-C(21) | 177.10(18)  |
| C(19)-O(20)-C(21)-C(23) | -57.5(2)    | C(19)-O(20)-C(21)-C(22) | 67.6(3)     |
| C(19)-O(20)-C(21)-C(24) | -175.43(19) | C(7)-C(6)-N(25)-C(26)   | 93.2(2)     |
| C(5)-C(6)-N(25)-C(26)   | -142.4(2)   | C(6)-N(25)-C(26)-O(26)  | 5.7(4)      |
| C(6)-N(25)-C(26)-C(27)  | -174.88(19) |                         |             |

**Table S10.** Hydrogen bonds for **19** [ $\text{\AA}$  and  $^\circ$ ]

| D-H...A                | d(D-H) | d(H...A) | d(D...A) | $\angle(\text{DHA})$ |
|------------------------|--------|----------|----------|----------------------|
| N(18)-H(18A)...O(26)#1 | 0.88   | 1.99     | 2.784(2) | 149.6                |
| N(25)-H(25A)...O(19)   | 0.88   | 2.17     | 2.953(2) | 147.5                |

Symmetry transformations used to generate equivalent atoms:

#1  $x+1,y,z$

**Table S11.** Crystal data and structure refinement for **20**

|                                         |                                                                   |                              |
|-----------------------------------------|-------------------------------------------------------------------|------------------------------|
| Empirical formula                       | $C_{26}H_{42}ClN_3O_5$                                            |                              |
| Formula weight                          | 512.07                                                            |                              |
| Temperature                             | 150(2) K                                                          |                              |
| Wavelength                              | 1.54178 Å                                                         |                              |
| Crystal system                          | Monoclinic                                                        |                              |
| Space group                             | C2                                                                |                              |
| Unit cell dimensions                    | $a = 14.8766(8)$ Å                                                | $\alpha = 90^\circ$ .        |
|                                         | $b = 9.9184(5)$ Å                                                 | $\beta = 105.562(2)^\circ$ . |
|                                         | $c = 19.7465(10)$ Å                                               | $\gamma = 90^\circ$ .        |
| Volume                                  | $2806.8(3)$ Å <sup>3</sup>                                        |                              |
| Z                                       | 4                                                                 |                              |
| Density (150K)                          | 1.212 Mg/m <sup>3</sup>                                           |                              |
| Absorption coefficient                  | 1.517 mm <sup>-1</sup>                                            |                              |
| F(000)                                  | 1104                                                              |                              |
| Crystal size                            | 0.214 x 0.115 x 0.030 mm <sup>3</sup>                             |                              |
| $\theta$ range for data collection      | 4.649 to 74.509°.                                                 |                              |
| Index ranges                            | $-16 \leq h \leq 18$ , $-9 \leq k \leq 11$ , $-23 \leq l \leq 21$ |                              |
| Reflections collected                   | 8951                                                              |                              |
| Independent reflections                 | 3980 [R(int) = 0.0194]                                            |                              |
| Completeness to $\theta = 67.679^\circ$ | 93.9 %                                                            |                              |
| Absorption correction                   | Semi-empirical from equivalents                                   |                              |
| Max. and min. transmission              | 0.7538 and 0.6782                                                 |                              |
| Refinement method                       | Full-matrix least-squares on F <sup>2</sup>                       |                              |
| Data / restraints / parameters          | 3980 / 3 / 328                                                    |                              |
| Goodness-of-fit on F <sup>2</sup>       | 1.044                                                             |                              |
| Final R indices [ $I > 2\sigma(I)$ ]    | R1 = 0.0300, wR2 = 0.0794                                         |                              |
| R indices (all data)                    | R1 = 0.0313, wR2 = 0.0807                                         |                              |
| Absolute structure parameter            | 0.056(6)                                                          |                              |
| Largest diff. peak and hole             | 0.246 and -0.291 e.Å <sup>-3</sup>                                |                              |

**Table S12.** Atomic coordinates ( $\times 10^4$ ) and equivalent isotropic displacement parameters ( $\text{\AA}^2 \times 10^3$ ) for **20**.  $U(\text{eq})$  is defined as one third of the trace of the orthogonalized  $U^{ij}$  tensor

|        | x       | y        | z       | U(eq) |
|--------|---------|----------|---------|-------|
| C(1)   | 7973(2) | 7985(3)  | 8065(1) | 34(1) |
| C(2)   | 8052(2) | 7408(3)  | 7449(1) | 32(1) |
| C(3)   | 7332(2) | 6611(2)  | 7051(1) | 27(1) |
| O(4)   | 5809(1) | 5651(2)  | 6895(1) | 34(1) |
| C(4)   | 6532(2) | 6400(2)  | 7281(1) | 26(1) |
| C(5)   | 5072(2) | 5384(2)  | 8051(1) | 29(1) |
| C(6)   | 5605(2) | 4191(2)  | 8464(1) | 33(1) |
| C(7)   | 5936(2) | 4489(3)  | 9250(1) | 40(1) |
| C(8)   | 6434(2) | 5841(3)  | 9405(1) | 34(1) |
| C(9)   | 6254(2) | 8342(2)  | 9192(1) | 30(1) |
| C(10)  | 7170(2) | 8447(3)  | 8988(1) | 36(1) |
| C(11)  | 7187(2) | 7763(2)  | 8308(1) | 29(1) |
| C(12)  | 6463(1) | 6935(2)  | 7927(1) | 24(1) |
| C(13)  | 5578(1) | 6757(2)  | 8190(1) | 25(1) |
| C(14)  | 5819(2) | 6973(2)  | 8993(1) | 27(1) |
| C(15)  | 4882(2) | 7872(2)  | 7846(1) | 30(1) |
| C(16)  | 5239(2) | 9278(3)  | 8057(1) | 35(1) |
| N(17)  | 5539(1) | 9392(2)  | 8844(1) | 33(1) |
| C(17)  | 5821(2) | 10788(3) | 9085(2) | 49(1) |
| N(18)  | 7493(1) | 5994(2)  | 6439(1) | 30(1) |
| O(19)  | 6038(1) | 6081(2)  | 5668(1) | 42(1) |
| C(19)  | 6876(2) | 5857(3)  | 5803(1) | 33(1) |
| O(20)  | 7317(1) | 5415(2)  | 5335(1) | 40(1) |
| C(21)  | 6790(2) | 5166(3)  | 4592(1) | 43(1) |
| C(22)  | 6096(2) | 4041(4)  | 4549(2) | 62(1) |
| C(23)  | 7561(2) | 4736(4)  | 4272(2) | 56(1) |
| C(24)  | 6334(2) | 6463(4)  | 4264(1) | 57(1) |
| N(25)  | 6387(1) | 3764(2)  | 8196(1) | 34(1) |
| O(26)  | 5458(2) | 2509(2)  | 7347(1) | 57(1) |
| C(26)  | 6245(2) | 2966(3)  | 7635(1) | 41(1) |
| C(27)  | 7079(2) | 2657(4)  | 7373(2) | 56(1) |
| C(1S)  | 5403(2) | 9191(4)  | 6139(2) | 60(1) |
| C(2S)  | 4733(2) | 10309(4) | 5923(2) | 56(1) |
| O(3S)  | 4389(1) | 10762(3) | 6492(1) | 51(1) |
| Cl(28) | 3602(1) | 9294(1)  | 9064(1) | 49(1) |

**Table S13.** Bond lengths [Å] and angles [°] for **20**

|                 |            |                 |            |
|-----------------|------------|-----------------|------------|
| C(1)-C(2)       | 1.377(3)   | C(1)-C(11)      | 1.395(3)   |
| C(1)-H(1)       | 0.9500     | C(2)-C(3)       | 1.393(3)   |
| C(2)-H(2)       | 0.9500     | C(3)-C(4)       | 1.399(3)   |
| C(3)-N(18)      | 1.430(3)   | O(4)-C(4)       | 1.360(3)   |
| O(4)-H(4)       | 0.822(12)  | C(4)-C(12)      | 1.411(3)   |
| C(5)-C(6)       | 1.532(3)   | C(5)-C(13)      | 1.545(3)   |
| C(5)-H(5A)      | 0.9900     | C(5)-H(5B)      | 0.9900     |
| C(6)-N(25)      | 1.464(3)   | C(6)-C(7)       | 1.526(3)   |
| C(6)-H(6)       | 1.0000     | C(7)-C(8)       | 1.523(4)   |
| C(7)-H(7A)      | 0.9900     | C(7)-H(7B)      | 0.9900     |
| C(8)-C(14)      | 1.536(3)   | C(8)-H(8A)      | 0.9900     |
| C(8)-H(8B)      | 0.9900     | C(9)-C(14)      | 1.510(3)   |
| C(9)-N(17)      | 1.515(3)   | C(9)-C(10)      | 1.525(3)   |
| C(9)-H(9)       | 1.0000     | C(10)-C(11)     | 1.511(3)   |
| C(10)-H(10A)    | 0.9900     | C(10)-H(10B)    | 0.9900     |
| C(11)-C(12)     | 1.403(3)   | C(12)-C(13)     | 1.549(3)   |
| C(13)-C(15)     | 1.542(3)   | C(13)-C(14)     | 1.544(3)   |
| C(14)-H(14)     | 1.0000     | C(15)-C(16)     | 1.510(4)   |
| C(15)-H(15A)    | 0.9900     | C(15)-H(15B)    | 0.9900     |
| C(16)-N(17)     | 1.500(3)   | C(16)-H(16A)    | 0.9900     |
| C(16)-H(16B)    | 0.9900     | N(17)-C(17)     | 1.488(3)   |
| N(17)-H(17)     | 1.0000     | C(17)-H(17A)    | 0.9800     |
| C(17)-H(17B)    | 0.9800     | C(17)-H(17C)    | 0.9800     |
| N(18)-C(19)     | 1.350(3)   | N(18)-H(18)     | 0.8800     |
| O(19)-C(19)     | 1.223(3)   | C(19)-O(20)     | 1.342(3)   |
| O(20)-C(21)     | 1.487(3)   | C(21)-C(22)     | 1.507(5)   |
| C(21)-C(23)     | 1.511(4)   | C(21)-C(24)     | 1.516(5)   |
| C(22)-H(22A)    | 0.9800     | C(22)-H(22B)    | 0.9800     |
| C(22)-H(22C)    | 0.9800     | C(23)-H(23A)    | 0.9800     |
| C(23)-H(23B)    | 0.9800     | C(23)-H(23C)    | 0.9800     |
| C(24)-H(24A)    | 0.9800     | C(24)-H(24B)    | 0.9800     |
| C(24)-H(24C)    | 0.9800     | N(25)-C(26)     | 1.331(3)   |
| N(25)-H(25)     | 0.8800     | O(26)-C(26)     | 1.242(3)   |
| C(26)-C(27)     | 1.498(4)   | C(27)-H(27A)    | 0.9800     |
| C(27)-H(27B)    | 0.9800     | C(27)-H(27C)    | 0.9800     |
| C(1S)-C(2S)     | 1.476(5)   | C(1S)-H(1S)     | 0.9800     |
| C(1S)-H(2S)     | 0.9800     | C(1S)-H(3S)     | 0.9800     |
| C(2S)-O(3S)     | 1.425(3)   | C(2S)-H(4S)     | 0.9900     |
| C(2S)-H(5S)     | 0.9900     | O(3S)-H(6S)     | 0.822(12)  |
| C(2)-C(1)-C(11) | 121.1(2)   | C(2)-C(1)-H(1)  | 119.4      |
| C(11)-C(1)-H(1) | 119.4      | C(1)-C(2)-C(3)  | 120.0(2)   |
| C(1)-C(2)-H(2)  | 120.0      | C(3)-C(2)-H(2)  | 120.0      |
| C(2)-C(3)-C(4)  | 119.57(19) | C(2)-C(3)-N(18) | 116.25(18) |

**Table S13.** (continued)

---

|                     |            |                     |            |
|---------------------|------------|---------------------|------------|
| C(4)-C(3)-N(18)     | 124.09(19) | C(4)-O(4)-H(4)      | 110(2)     |
| O(4)-C(4)-C(3)      | 120.88(18) | O(4)-C(4)-C(12)     | 118.27(18) |
| C(3)-C(4)-C(12)     | 120.84(19) | C(6)-C(5)-C(13)     | 115.36(18) |
| C(6)-C(5)-H(5A)     | 108.4      | C(13)-C(5)-H(5A)    | 108.4      |
| C(6)-C(5)-H(5B)     | 108.4      | C(13)-C(5)-H(5B)    | 108.4      |
| H(5A)-C(5)-H(5B)    | 107.5      | N(25)-C(6)-C(7)     | 110.66(19) |
| N(25)-C(6)-C(5)     | 112.23(18) | C(7)-C(6)-C(5)      | 111.8(2)   |
| N(25)-C(6)-H(6)     | 107.3      | C(7)-C(6)-H(6)      | 107.3      |
| C(5)-C(6)-H(6)      | 107.3      | C(8)-C(7)-C(6)      | 112.5(2)   |
| C(8)-C(7)-H(7A)     | 109.1      | C(6)-C(7)-H(7A)     | 109.1      |
| C(8)-C(7)-H(7B)     | 109.1      | C(6)-C(7)-H(7B)     | 109.1      |
| H(7A)-C(7)-H(7B)    | 107.8      | C(7)-C(8)-C(14)     | 110.43(19) |
| C(7)-C(8)-H(8A)     | 109.6      | C(14)-C(8)-H(8A)    | 109.6      |
| C(7)-C(8)-H(8B)     | 109.6      | C(14)-C(8)-H(8B)    | 109.6      |
| H(8A)-C(8)-H(8B)    | 108.1      | C(14)-C(9)-N(17)    | 107.51(18) |
| C(14)-C(9)-C(10)    | 110.11(18) | N(17)-C(9)-C(10)    | 113.69(19) |
| C(14)-C(9)-H(9)     | 108.5      | N(17)-C(9)-H(9)     | 108.5      |
| C(10)-C(9)-H(9)     | 108.5      | C(11)-C(10)-C(9)    | 115.70(19) |
| C(11)-C(10)-H(10A)  | 108.4      | C(9)-C(10)-H(10A)   | 108.4      |
| C(11)-C(10)-H(10B)  | 108.4      | C(9)-C(10)-H(10B)   | 108.4      |
| H(10A)-C(10)-H(10B) | 107.4      | C(1)-C(11)-C(12)    | 120.1(2)   |
| C(1)-C(11)-C(10)    | 116.8(2)   | C(12)-C(11)-C(10)   | 123.0(2)   |
| C(11)-C(12)-C(4)    | 118.23(19) | C(11)-C(12)-C(13)   | 119.15(18) |
| C(4)-C(12)-C(13)    | 122.33(18) | C(15)-C(13)-C(14)   | 107.25(17) |
| C(15)-C(13)-C(5)    | 108.45(17) | C(14)-C(13)-C(5)    | 105.84(17) |
| C(15)-C(13)-C(12)   | 107.50(17) | C(14)-C(13)-C(12)   | 110.11(17) |
| C(5)-C(13)-C(12)    | 117.28(18) | C(9)-C(14)-C(8)     | 111.56(19) |
| C(9)-C(14)-C(13)    | 110.90(18) | C(8)-C(14)-C(13)    | 112.57(18) |
| C(9)-C(14)-H(14)    | 107.2      | C(8)-C(14)-H(14)    | 107.2      |
| C(13)-C(14)-H(14)   | 107.2      | C(16)-C(15)-C(13)   | 113.35(18) |
| C(16)-C(15)-H(15A)  | 108.9      | C(13)-C(15)-H(15A)  | 108.9      |
| C(16)-C(15)-H(15B)  | 108.9      | C(13)-C(15)-H(15B)  | 108.9      |
| H(15A)-C(15)-H(15B) | 107.7      | N(17)-C(16)-C(15)   | 109.90(18) |
| N(17)-C(16)-H(16A)  | 109.7      | C(15)-C(16)-H(16A)  | 109.7      |
| N(17)-C(16)-H(16B)  | 109.7      | C(15)-C(16)-H(16B)  | 109.7      |
| H(16A)-C(16)-H(16B) | 108.2      | C(17)-N(17)-C(16)   | 112.44(19) |
| C(17)-N(17)-C(9)    | 113.0(2)   | C(16)-N(17)-C(9)    | 113.30(17) |
| C(17)-N(17)-H(17)   | 105.7      | C(16)-N(17)-H(17)   | 105.7      |
| C(9)-N(17)-H(17)    | 105.7      | N(17)-C(17)-H(17A)  | 109.5      |
| N(17)-C(17)-H(17B)  | 109.5      | H(17A)-C(17)-H(17B) | 109.5      |
| N(17)-C(17)-H(17C)  | 109.5      | H(17A)-C(17)-H(17C) | 109.5      |
| H(17B)-C(17)-H(17C) | 109.5      | C(19)-N(18)-C(3)    | 127.06(18) |
| C(19)-N(18)-H(18)   | 116.5      | C(3)-N(18)-H(18)    | 116.5      |

**Table S13.** (continued)

---

|                     |            |                     |            |
|---------------------|------------|---------------------|------------|
| O(19)-C(19)-O(20)   | 124.6(2)   | O(19)-C(19)-N(18)   | 125.7(2)   |
| O(20)-C(19)-N(18)   | 109.69(19) | C(19)-O(20)-C(21)   | 120.47(18) |
| O(20)-C(21)-C(22)   | 110.5(2)   | O(20)-C(21)-C(23)   | 101.6(2)   |
| C(22)-C(21)-C(23)   | 110.7(3)   | O(20)-C(21)-C(24)   | 109.7(2)   |
| C(22)-C(21)-C(24)   | 112.5(3)   | C(23)-C(21)-C(24)   | 111.4(3)   |
| C(21)-C(22)-H(22A)  | 109.5      | C(21)-C(22)-H(22B)  | 109.5      |
| H(22A)-C(22)-H(22B) | 109.5      | C(21)-C(22)-H(22C)  | 109.5      |
| H(22A)-C(22)-H(22C) | 109.5      | H(22B)-C(22)-H(22C) | 109.5      |
| C(21)-C(23)-H(23A)  | 109.5      | C(21)-C(23)-H(23B)  | 109.5      |
| H(23A)-C(23)-H(23B) | 109.5      | C(21)-C(23)-H(23C)  | 109.5      |
| H(23A)-C(23)-H(23C) | 109.5      | H(23B)-C(23)-H(23C) | 109.5      |
| C(21)-C(24)-H(24A)  | 109.5      | C(21)-C(24)-H(24B)  | 109.5      |
| H(24A)-C(24)-H(24B) | 109.5      | C(21)-C(24)-H(24C)  | 109.5      |
| H(24A)-C(24)-H(24C) | 109.5      | H(24B)-C(24)-H(24C) | 109.5      |
| C(26)-N(25)-C(6)    | 120.6(2)   | C(26)-N(25)-H(25)   | 119.7      |
| C(6)-N(25)-H(25)    | 119.7      | O(26)-C(26)-N(25)   | 121.2(2)   |
| O(26)-C(26)-C(27)   | 122.2(2)   | N(25)-C(26)-C(27)   | 116.7(2)   |
| C(26)-C(27)-H(27A)  | 109.5      | C(26)-C(27)-H(27B)  | 109.5      |
| H(27A)-C(27)-H(27B) | 109.5      | C(26)-C(27)-H(27C)  | 109.5      |
| H(27A)-C(27)-H(27C) | 109.5      | H(27B)-C(27)-H(27C) | 109.5      |
| C(2S)-C(1S)-H(1S)   | 109.5      | C(2S)-C(1S)-H(2S)   | 109.5      |
| H(1S)-C(1S)-H(2S)   | 109.5      | C(2S)-C(1S)-H(3S)   | 109.5      |
| H(1S)-C(1S)-H(3S)   | 109.5      | H(2S)-C(1S)-H(3S)   | 109.5      |
| O(3S)-C(2S)-C(1S)   | 111.5(3)   | O(3S)-C(2S)-H(4S)   | 109.3      |
| C(1S)-C(2S)-H(4S)   | 109.3      | O(3S)-C(2S)-H(5S)   | 109.3      |
| C(1S)-C(2S)-H(5S)   | 109.3      | H(4S)-C(2S)-H(5S)   | 108.0      |
| C(2S)-O(3S)-H(6S)   | 114(3)     |                     |            |

---



**Table S14.** Anisotropic displacement parameters ( $\text{\AA}^2 \times 10^3$ ) for **20**. The anisotropic displacement factor exponent takes the form:  $-2\pi^2[h^2a^*2U^{11} + \dots + 2hk a^* b^* U^{12}]$

|        | U11   | U22   | U33   | U23    | U13   | U12    |
|--------|-------|-------|-------|--------|-------|--------|
| C(1)   | 29(1) | 40(1) | 32(1) | -8(1)  | 8(1)  | -10(1) |
| C(2)   | 28(1) | 43(1) | 27(1) | -3(1)  | 11(1) | -5(1)  |
| C(3)   | 28(1) | 34(1) | 21(1) | -2(1)  | 8(1)  | 1(1)   |
| O(4)   | 30(1) | 46(1) | 24(1) | -8(1)  | 5(1)  | -10(1) |
| C(4)   | 24(1) | 29(1) | 22(1) | 0(1)   | 2(1)  | -2(1)  |
| C(5)   | 24(1) | 33(1) | 31(1) | 2(1)   | 9(1)  | -3(1)  |
| C(6)   | 35(1) | 29(1) | 38(1) | 4(1)   | 13(1) | -1(1)  |
| C(7)   | 52(2) | 35(1) | 35(1) | 10(1)  | 14(1) | 7(1)   |
| C(8)   | 42(1) | 36(1) | 23(1) | 3(1)   | 7(1)  | 8(1)   |
| C(9)   | 36(1) | 33(1) | 23(1) | -2(1)  | 9(1)  | 1(1)   |
| C(10)  | 35(1) | 44(1) | 30(1) | -12(1) | 9(1)  | -9(1)  |
| C(11)  | 29(1) | 34(1) | 24(1) | -3(1)  | 8(1)  | -3(1)  |
| C(12)  | 23(1) | 30(1) | 20(1) | -1(1)  | 6(1)  | -1(1)  |
| C(13)  | 22(1) | 31(1) | 23(1) | 1(1)   | 7(1)  | -1(1)  |
| C(14)  | 30(1) | 31(1) | 23(1) | 2(1)   | 10(1) | 3(1)   |
| C(15)  | 27(1) | 35(1) | 28(1) | 3(1)   | 8(1)  | 4(1)   |
| C(16)  | 44(1) | 36(1) | 26(1) | 7(1)   | 11(1) | 7(1)   |
| N(17)  | 45(1) | 29(1) | 29(1) | 1(1)   | 15(1) | 2(1)   |
| C(17)  | 75(2) | 31(1) | 42(2) | -2(1)  | 19(1) | -1(1)  |
| N(18)  | 25(1) | 44(1) | 22(1) | -5(1)  | 8(1)  | 5(1)   |
| O(19)  | 29(1) | 70(1) | 26(1) | -6(1)  | 3(1)  | 10(1)  |
| C(19)  | 33(1) | 44(1) | 24(1) | -3(1)  | 8(1)  | 5(1)   |
| O(20)  | 32(1) | 65(1) | 23(1) | -10(1) | 6(1)  | 8(1)   |
| C(21)  | 39(2) | 68(2) | 21(1) | -14(1) | 4(1)  | 1(1)   |
| C(22)  | 54(2) | 78(2) | 53(2) | -25(2) | 13(1) | -11(2) |
| C(23)  | 51(2) | 86(2) | 32(1) | -19(1) | 13(1) | 5(2)   |
| C(24)  | 53(2) | 86(2) | 27(1) | 0(1)   | 4(1)  | 12(2)  |
| N(25)  | 31(1) | 32(1) | 38(1) | -2(1)  | 7(1)  | -1(1)  |
| O(26)  | 51(1) | 57(1) | 65(1) | -25(1) | 18(1) | -21(1) |
| C(26)  | 44(2) | 33(1) | 45(1) | -6(1)  | 13(1) | -3(1)  |
| C(27)  | 52(2) | 56(2) | 63(2) | -18(2) | 22(2) | 6(1)   |
| C(1S)  | 75(2) | 50(2) | 66(2) | -5(2)  | 39(2) | -2(2)  |
| C(2S)  | 47(2) | 86(2) | 35(2) | -11(1) | 12(1) | 13(2)  |
| O(3S)  | 33(1) | 77(2) | 43(1) | -25(1) | 12(1) | -2(1)  |
| Cl(28) | 38(1) | 80(1) | 29(1) | 4(1)   | 11(1) | 14(1)  |

**Table S15.** Hydrogen coordinates ( $\times 10^4$ ) and isotropic displacement parameters ( $\text{\AA}^2 \times 10^3$ ) for **20**

|        | x        | y         | z        | U(eq) |
|--------|----------|-----------|----------|-------|
| H(1)   | 8461     | 8543      | 8328     | 40    |
| H(2)   | 8598     | 7554      | 7297     | 38    |
| H(4)   | 5820(20) | 5630(40)  | 6482(8)  | 51    |
| H(5A)  | 4465     | 5467      | 8165     | 35    |
| H(5B)  | 4938     | 5180      | 7543     | 35    |
| H(6)   | 5160     | 3416      | 8402     | 40    |
| H(7A)  | 5392     | 4487      | 9449     | 48    |
| H(7B)  | 6365     | 3765      | 9485     | 48    |
| H(8A)  | 7029     | 5803      | 9272     | 41    |
| H(8B)  | 6579     | 6033      | 9915     | 41    |
| H(9)   | 6389     | 8450      | 9713     | 36    |
| H(10A) | 7317     | 9414      | 8952     | 44    |
| H(10B) | 7672     | 8054      | 9372     | 44    |
| H(14)  | 5218     | 6958      | 9129     | 33    |
| H(15A) | 4743     | 7787      | 7329     | 36    |
| H(15B) | 4292     | 7735      | 7978     | 36    |
| H(16A) | 5773     | 9478      | 7864     | 42    |
| H(16B) | 4740     | 9943      | 7862     | 42    |
| H(17)  | 4970     | 9194      | 9004     | 40    |
| H(17A) | 6301     | 11105     | 8866     | 73    |
| H(17B) | 6070     | 10795     | 9597     | 73    |
| H(17C) | 5276     | 11384     | 8950     | 73    |
| H(18)  | 8056     | 5667      | 6483     | 36    |
| H(22A) | 6407     | 3269      | 4824     | 93    |
| H(22B) | 5843     | 3771      | 4057     | 93    |
| H(22C) | 5587     | 4353      | 4738     | 93    |
| H(23A) | 8008     | 5476      | 4310     | 84    |
| H(23B) | 7294     | 4508      | 3776     | 84    |
| H(23C) | 7880     | 3946      | 4524     | 84    |
| H(24A) | 5826     | 6701      | 4471     | 85    |
| H(24B) | 6084     | 6338      | 3756     | 85    |
| H(24C) | 6798     | 7188      | 4354     | 85    |
| H(25)  | 6955     | 4038      | 8407     | 40    |
| H(27A) | 7159     | 1678      | 7356     | 84    |
| H(27B) | 7637     | 3057      | 7690     | 84    |
| H(27C) | 6986     | 3034      | 6900     | 84    |
| H(1S)  | 5960     | 9517      | 6488     | 90    |
| H(2S)  | 5581     | 8848      | 5727     | 90    |
| H(3S)  | 5114     | 8465      | 6344     | 90    |
| H(4S)  | 5042     | 11069     | 5750     | 67    |
| H(5S)  | 4203     | 10005     | 5533     | 67    |
| H(6S)  | 4730(20) | 11320(30) | 6747(18) | 76    |

**Table S16.** Torsion angles [°] for **20**

---

|                         |             |                         |             |
|-------------------------|-------------|-------------------------|-------------|
| C(11)-C(1)-C(2)-C(3)    | 1.4(4)      | C(1)-C(2)-C(3)-C(4)     | -0.2(4)     |
| C(1)-C(2)-C(3)-N(18)    | -176.8(2)   | C(2)-C(3)-C(4)-O(4)     | 178.6(2)    |
| N(18)-C(3)-C(4)-O(4)    | -5.1(3)     | C(2)-C(3)-C(4)-C(12)    | -2.8(3)     |
| N(18)-C(3)-C(4)-C(12)   | 173.5(2)    | C(13)-C(5)-C(6)-N(25)   | -73.4(2)    |
| C(13)-C(5)-C(6)-C(7)    | 51.7(3)     | N(25)-C(6)-C(7)-C(8)    | 76.8(3)     |
| C(5)-C(6)-C(7)-C(8)     | -49.2(3)    | C(6)-C(7)-C(8)-C(14)    | 53.6(3)     |
| C(14)-C(9)-C(10)-C(11)  | 37.1(3)     | N(17)-C(9)-C(10)-C(11)  | -83.6(3)    |
| C(2)-C(1)-C(11)-C(12)   | 0.4(4)      | C(2)-C(1)-C(11)-C(10)   | -179.9(2)   |
| C(9)-C(10)-C(11)-C(1)   | 172.2(2)    | C(9)-C(10)-C(11)-C(12)  | -8.0(4)     |
| C(1)-C(11)-C(12)-C(4)   | -3.2(3)     | C(10)-C(11)-C(12)-C(4)  | 177.0(2)    |
| C(1)-C(11)-C(12)-C(13)  | -177.2(2)   | C(10)-C(11)-C(12)-C(13) | 3.0(3)      |
| O(4)-C(4)-C(12)-C(11)   | -176.84(19) | C(3)-C(4)-C(12)-C(11)   | 4.4(3)      |
| O(4)-C(4)-C(12)-C(13)   | -3.1(3)     | C(3)-C(4)-C(12)-C(13)   | 178.2(2)    |
| C(6)-C(5)-C(13)-C(15)   | -169.59(18) | C(6)-C(5)-C(13)-C(14)   | -54.8(2)    |
| C(6)-C(5)-C(13)-C(12)   | 68.5(2)     | C(11)-C(12)-C(13)-C(15) | 89.9(2)     |
| C(4)-C(12)-C(13)-C(15)  | -83.9(2)    | C(11)-C(12)-C(13)-C(14) | -26.7(3)    |
| C(4)-C(12)-C(13)-C(14)  | 159.61(19)  | C(11)-C(12)-C(13)-C(5)  | -147.7(2)   |
| C(4)-C(12)-C(13)-C(5)   | 38.5(3)     | N(17)-C(9)-C(14)-C(8)   | -171.74(17) |
| C(10)-C(9)-C(14)-C(8)   | 63.9(2)     | N(17)-C(9)-C(14)-C(13)  | 61.9(2)     |
| C(10)-C(9)-C(14)-C(13)  | -62.4(2)    | C(7)-C(8)-C(14)-C(9)    | 174.31(19)  |
| C(7)-C(8)-C(14)-C(13)   | -60.3(2)    | C(15)-C(13)-C(14)-C(9)  | -60.0(2)    |
| C(5)-C(13)-C(14)-C(9)   | -175.60(18) | C(12)-C(13)-C(14)-C(9)  | 56.7(2)     |
| C(15)-C(13)-C(14)-C(8)  | 174.25(19)  | C(5)-C(13)-C(14)-C(8)   | 58.6(2)     |
| C(12)-C(13)-C(14)-C(8)  | -69.1(2)    | C(14)-C(13)-C(15)-C(16) | 55.5(2)     |
| C(5)-C(13)-C(15)-C(16)  | 169.36(18)  | C(12)-C(13)-C(15)-C(16) | -62.9(2)    |
| C(13)-C(15)-C(16)-N(17) | -53.4(3)    | C(15)-C(16)-N(17)-C(17) | -175.1(2)   |
| C(15)-C(16)-N(17)-C(9)  | 55.2(3)     | C(14)-C(9)-N(17)-C(17)  | 171.00(19)  |
| C(10)-C(9)-N(17)-C(17)  | -66.9(2)    | C(14)-C(9)-N(17)-C(16)  | -59.6(2)    |
| C(10)-C(9)-N(17)-C(16)  | 62.5(2)     | C(2)-C(3)-N(18)-C(19)   | -139.5(3)   |
| C(4)-C(3)-N(18)-C(19)   | 44.0(4)     | C(3)-N(18)-C(19)-O(19)  | -10.3(4)    |
| C(3)-N(18)-C(19)-O(20)  | 170.7(2)    | O(19)-C(19)-O(20)-C(21) | 0.3(4)      |
| N(18)-C(19)-O(20)-C(21) | 179.4(2)    | C(19)-O(20)-C(21)-C(22) | -64.2(3)    |
| C(19)-O(20)-C(21)-C(23) | 178.3(3)    | C(19)-O(20)-C(21)-C(24) | 60.4(3)     |
| C(7)-C(6)-N(25)-C(26)   | 153.0(2)    | C(5)-C(6)-N(25)-C(26)   | -81.3(3)    |
| C(6)-N(25)-C(26)-O(26)  | -3.6(4)     | C(6)-N(25)-C(26)-C(27)  | 176.1(2)    |

---

**Table S17.** Hydrogen bonds for **20** [Å and °]

| D-H...A                 | d(D-H)    | d(H...A)  | d(D...A) | <(DHA) |
|-------------------------|-----------|-----------|----------|--------|
| O(4)-H(4)...O(19)       | 0.822(12) | 1.777(16) | 2.572(2) | 162(4) |
| C(5)-H(5B)...O(4)       | 0.99      | 2.10      | 2.797(3) | 125.6  |
| N(17)-H(17)...Cl(28)    | 1.00      | 2.07      | 3.028(2) | 159.4  |
| C(17)-H(17B)...Cl(28)#1 | 0.98      | 2.96      | 3.822(3) | 147.7  |
| N(18)-H(18)...O(3S)#2   | 0.88      | 1.98      | 2.804(3) | 155.1  |
| O(3S)-H(6S)...O(26)#3   | 0.822(12) | 1.814(13) | 2.635(3) | 177(4) |

Symmetry transformations used to generate equivalent atoms:

#1 -x+1,y,-z+2 #2 x+1/2,y-1/2,z #3 x,y+1,z

## Supporting Information References

- (1) Torres, O. B.; Jalah, R.; Rice, K. C.; Li, F.; Antoline, J. F.; Iyer, M. R.; Jacobson, A. E.; Boutaghou, M. N.; Alving, C. R.; Matyas, G. R. Characterization and optimization of heroin hapten-BSA conjugates: method development for the synthesis of reproducible hapten-based vaccines. *Anal. Bioanal. Chem.* **2014**, 406, 5927-37.
- (2) Jalah, R.; Torres, O. B.; Mayorov, A. V.; Li, F.; Antoline, J. F.; Jacobson, A. E.; Rice, K. C.; Deschamps, J. R.; Beck, Z.; Alving, C. R.; Matyas, G. R. Efficacy, but not antibody titer or affinity, of a heroin hapten conjugate vaccine correlates with increasing hapten densities on tetanus toxoid, but not on CRM197 carriers. *Bioconjug. Chem.* **2015**, 26, 1041-53.
- (3) Torres, O. B.; Alving, C. R.; Matyas, G. R. Synthesis of Hapten-Protein Conjugate Vaccines with Reproducible Hapten Densities. *Methods Mol. Biol.* **2016**, 1403, 695-710.
- (4) Matyas, G. R.; Mayorov, A. V.; Rice, K. C.; Jacobson, A. E.; Cheng, K.; Iyer, M. R.; Li, F.; Beck, Z.; Janda, K. D.; Alving, C. R. Liposomes containing monophosphoryl lipid A: a potent adjuvant system for inducing antibodies to heroin hapten analogs. *Vaccine* **2013**, 31, 2804-10.
- (5) Li, F.; Cheng, K.; Antoline, J. F.; Iyer, M. R.; Matyas, G. R.; Torres, O. B.; Jalah, R.; Beck, Z.; Alving, C. R.; Parrish, D. A.; Deschamps, J. R.; Jacobson, A. E.; Rice, K. C. Synthesis and immunological effects of heroin vaccines. *Org. Biomol. Chem.* **2014**, 12, 7211-32.
